# Supplementary material for: Association Between Twelve Polymorphisms in Five X-ray Repair Cross-complementing Genes and the Risk of Urological Neoplasms: A Systematic Review and Meta-Analysis
Source: PubMed Central journal article supplement — eBioMedicine. 2017 Mar 9;18:94–108. doi: 10.1016/j.ebiom.2017.03.009 (PMC5405151; doi:10.1016/j.ebiom.2017.03.009), 2017-03-09
Supplement: mmc1.pdf [file mmc1.pdf]

**Supplementary figure 1. Flow chart of studies selection process for polymorphisms in *XRCC1***

**genes.**

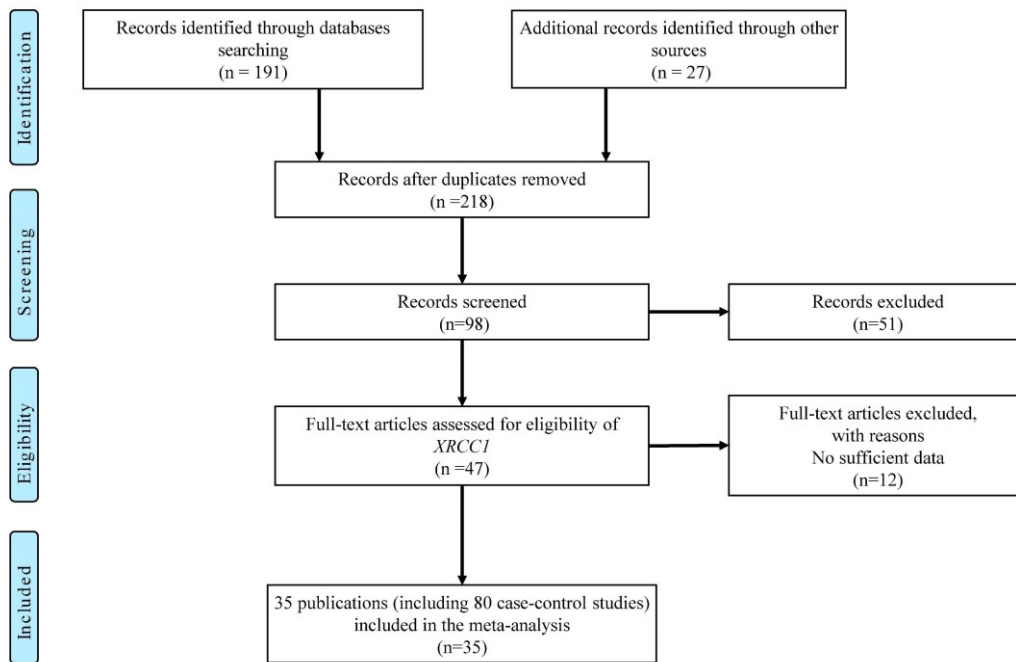

**Supplementary figure 2. Flow chart of studies selection process for polymorphisms in *XRCC2***

**genes.**

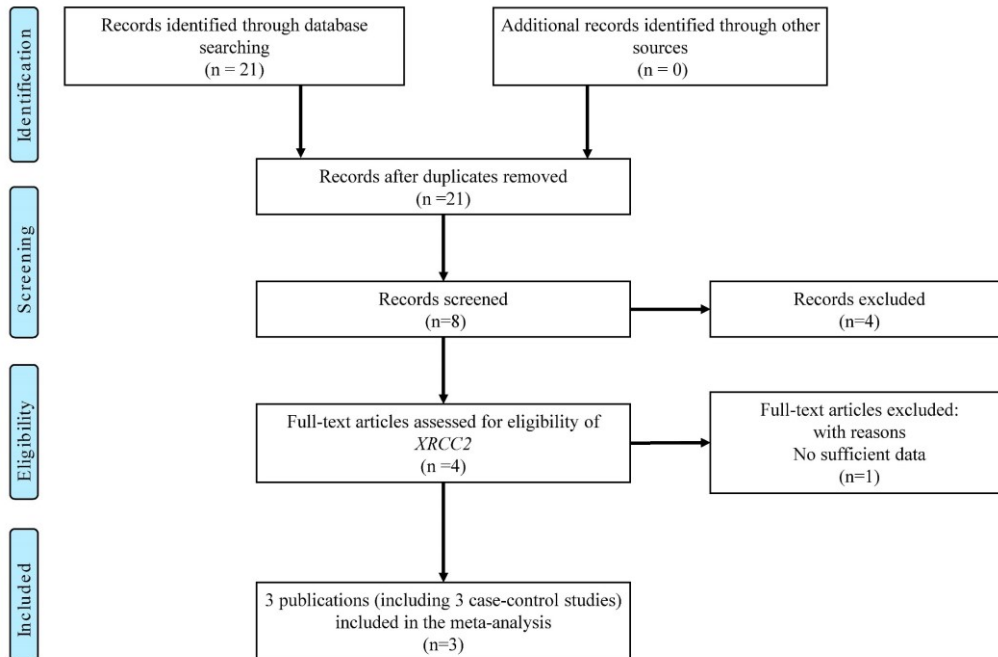

**Supplementary figure 3. Flow chart of studies selection process for polymorphisms in *XRCC3* genes.**

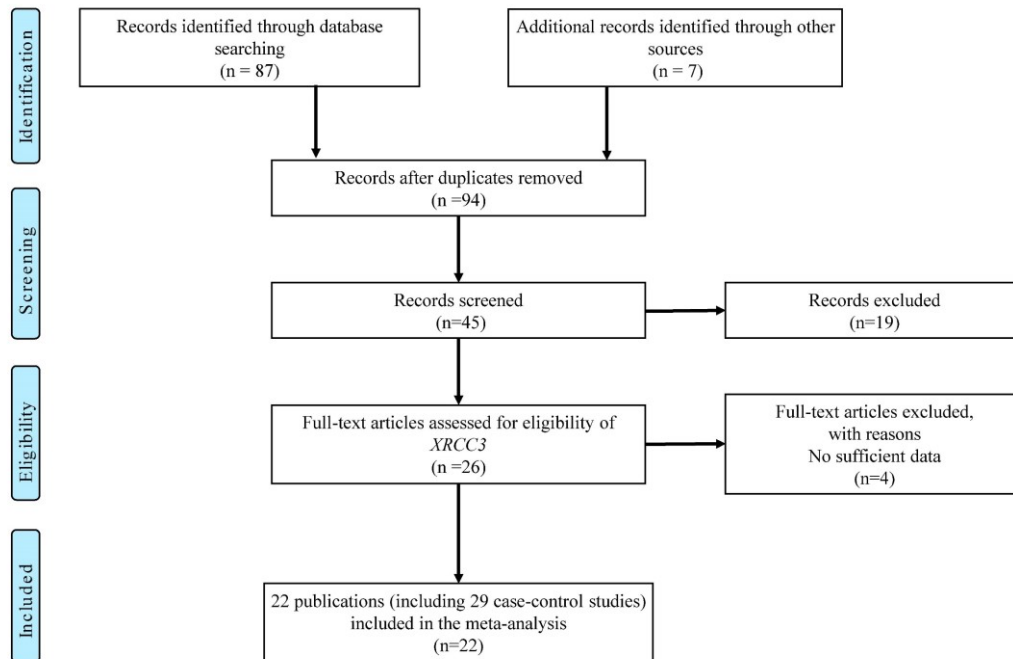

**Supplementary figure 4. Flow chart of studies selection process for polymorphisms in *XRCC4* genes.**

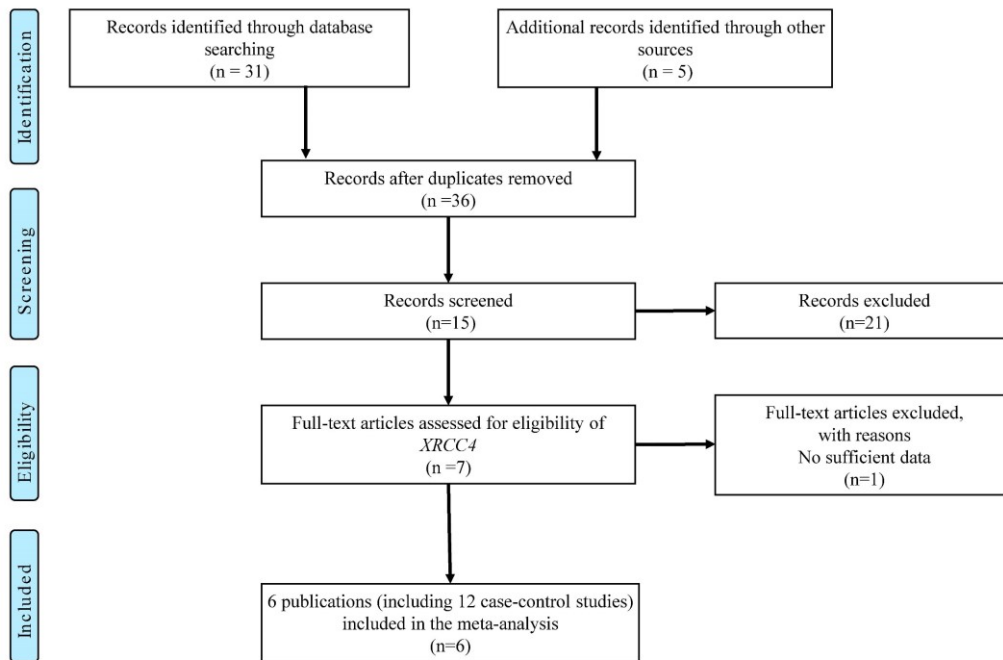

**Supplementary figure 5. Flow chart of studies selection process for polymorphisms in *XRCC7* genes.**

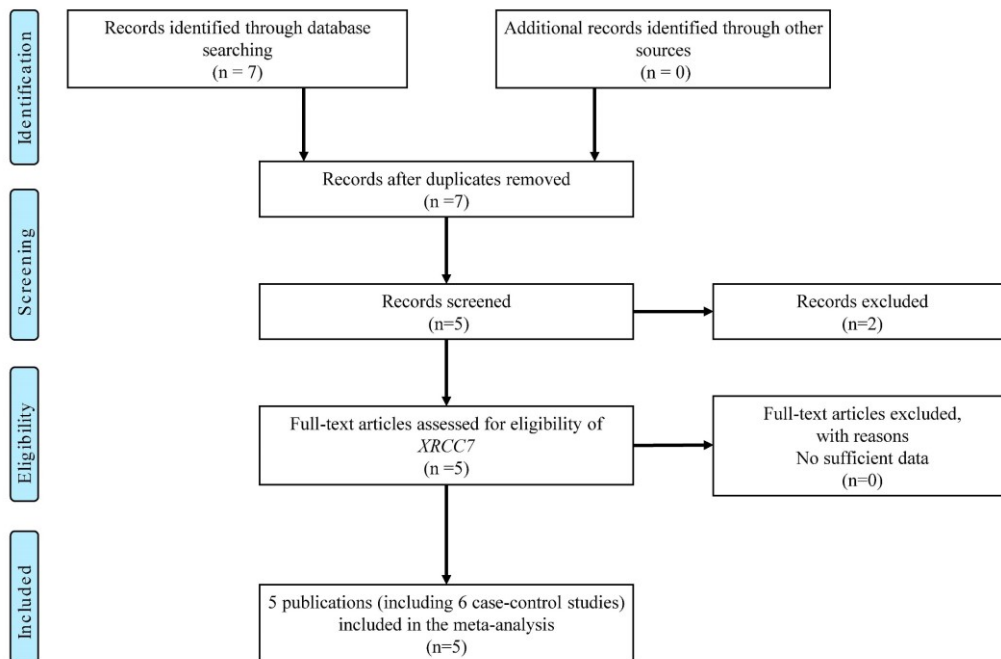

**Supplementary figure 6. Sensitivity analysis for *XRCC1*-rs25487 polymorphism and the risk of urological neoplasms (allelic comparison B vs. A).**

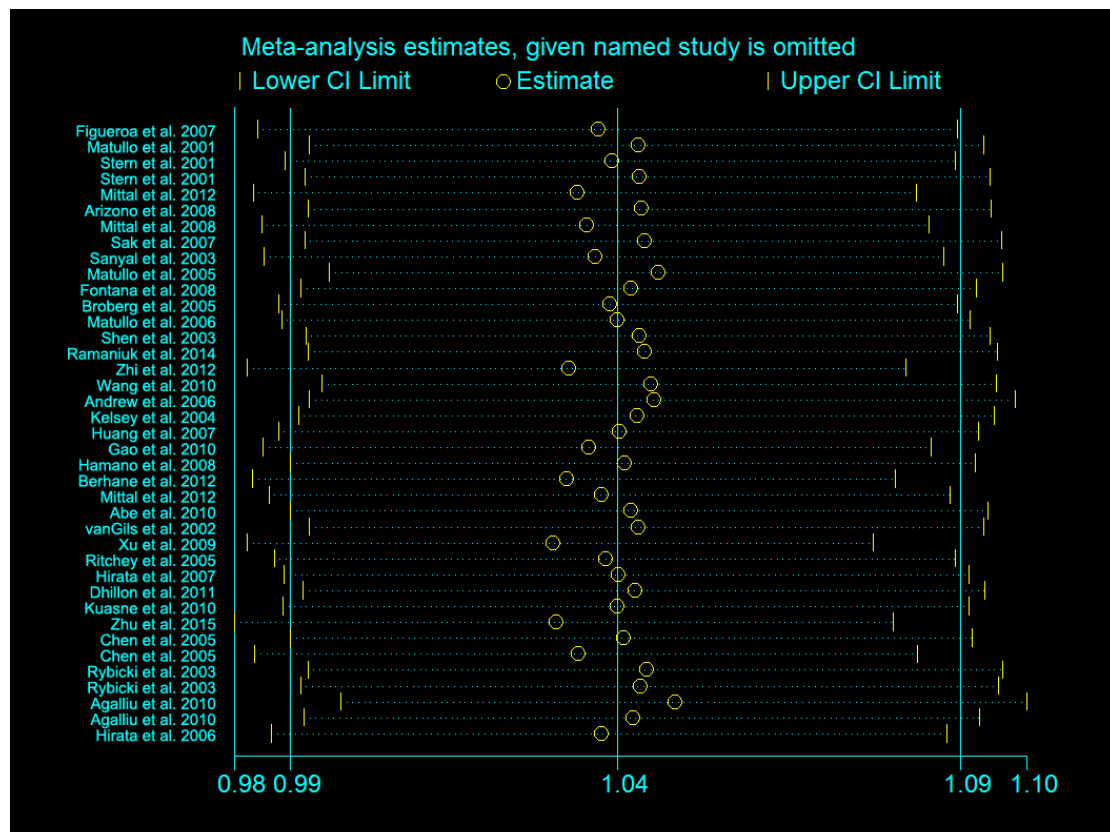

Supplementary figure 7. Sensitivity analysis for *XRCCI*-rs25489 polymorphism and the risk of urological neoplasms (allelic comparison B vs. A).

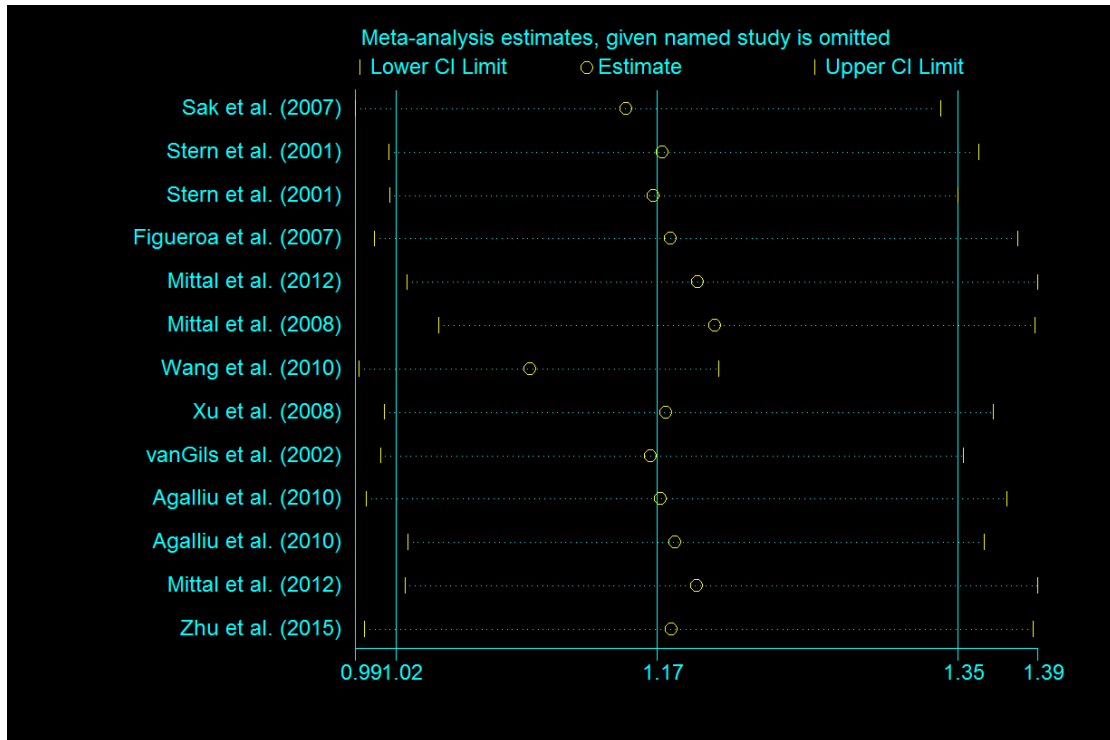

Supplementary figure 8. Sensitivity analysis for *XRCCI*-rs915927 polymorphism and the risk of urological neoplasms (allelic comparison B vs. A).

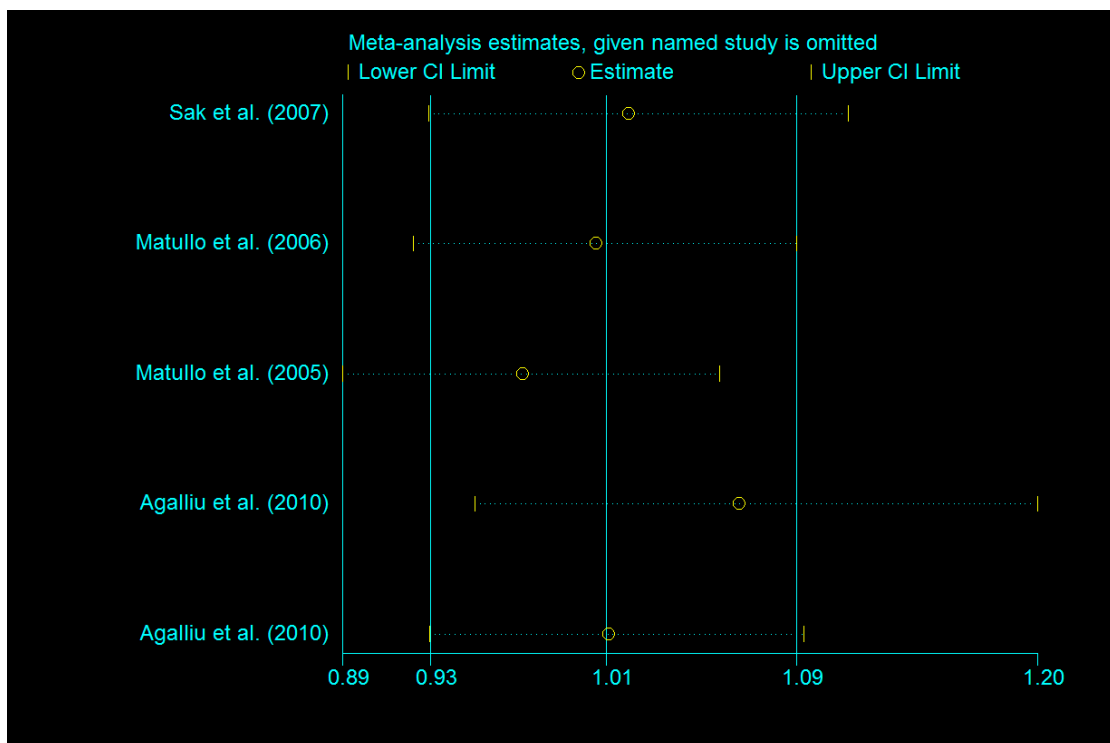

Supplementary figure 9. Sensitivity analysis for *XRCC1*-rs1799782 polymorphism and the risk of urological neoplasms (allelic comparison B vs. A).

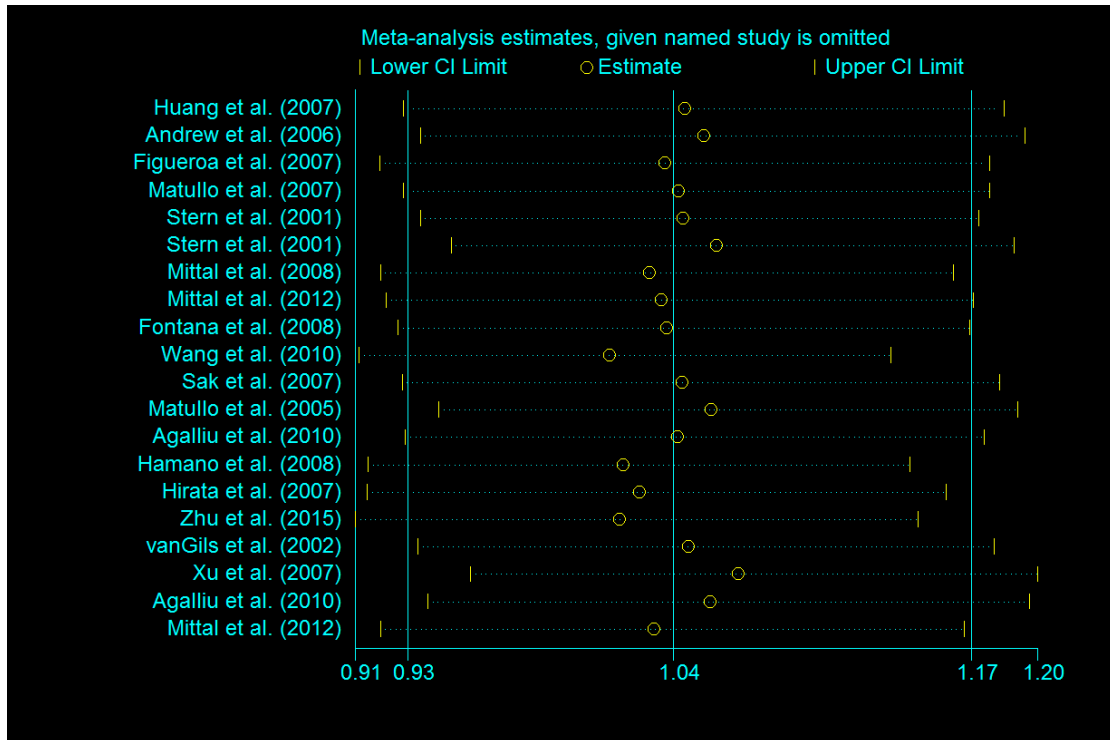

Supplementary figure 10. Sensitivity analysis for *XRCC1*-rs3213245 polymorphism and the risk of urological neoplasms (allelic comparison B vs. A).

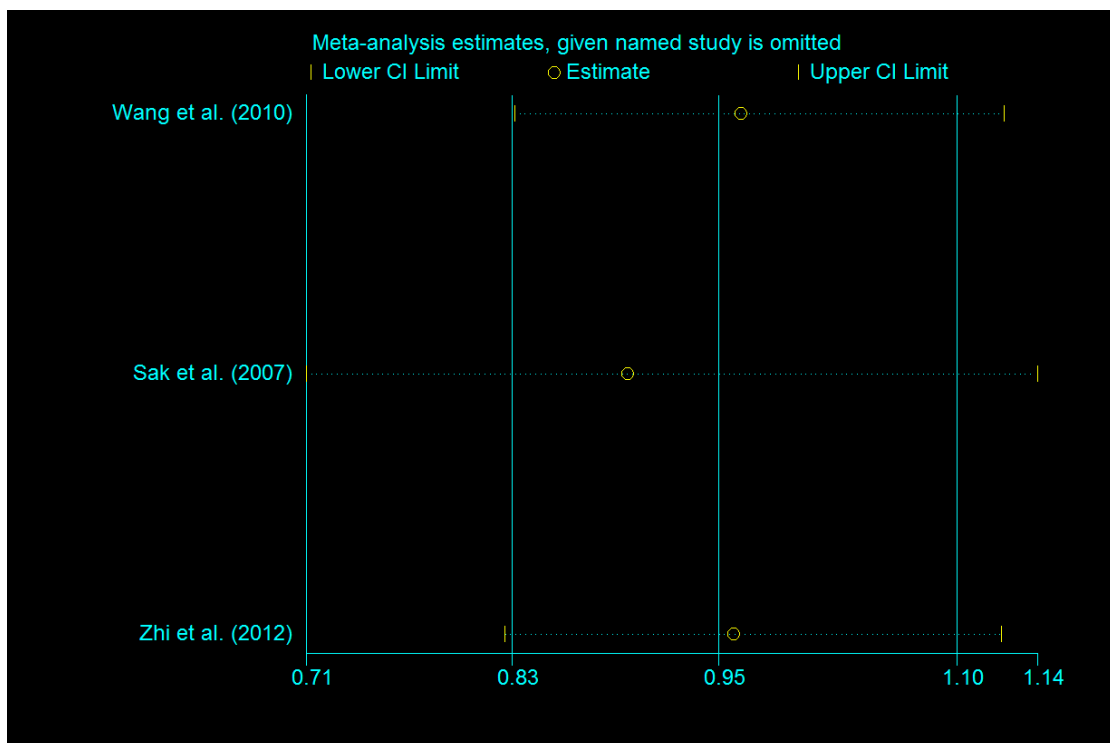

Supplementary figure 11. Sensitivity analysis for *XRCC2*-rs3218536 polymorphism and the risk of urological neoplasms (allelic comparison B vs. A).

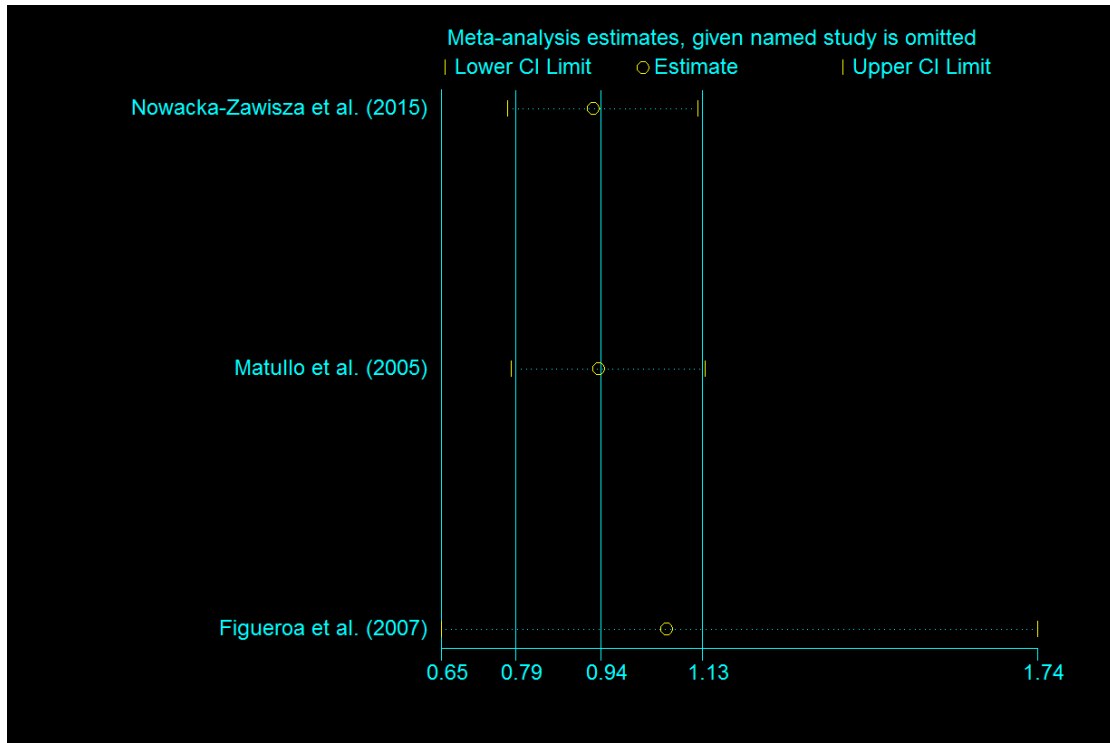

Supplementary figure 12. Sensitivity analysis for *XRCC3*-rs861539 polymorphism and the risk of urological neoplasms (allelic comparison B vs. A).

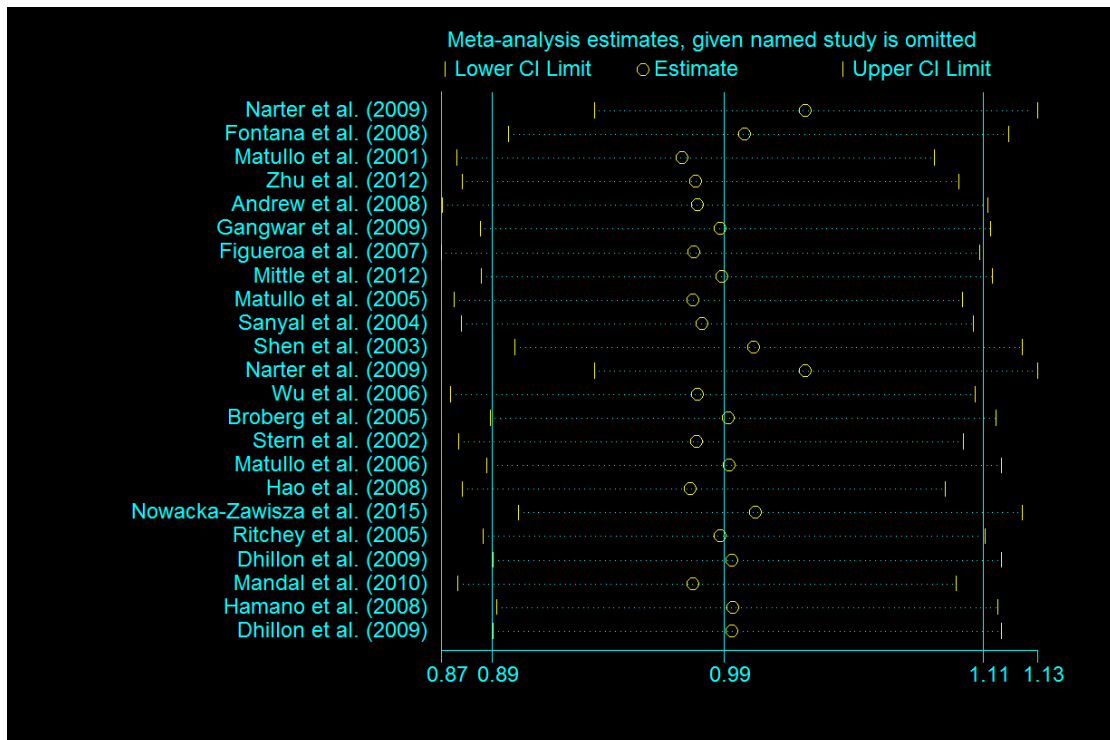

Supplementary figure 13. Sensitivity analysis for *XRCC3*-rs1799796 polymorphism and the risk of urological neoplasms (allelic comparison B vs. A).

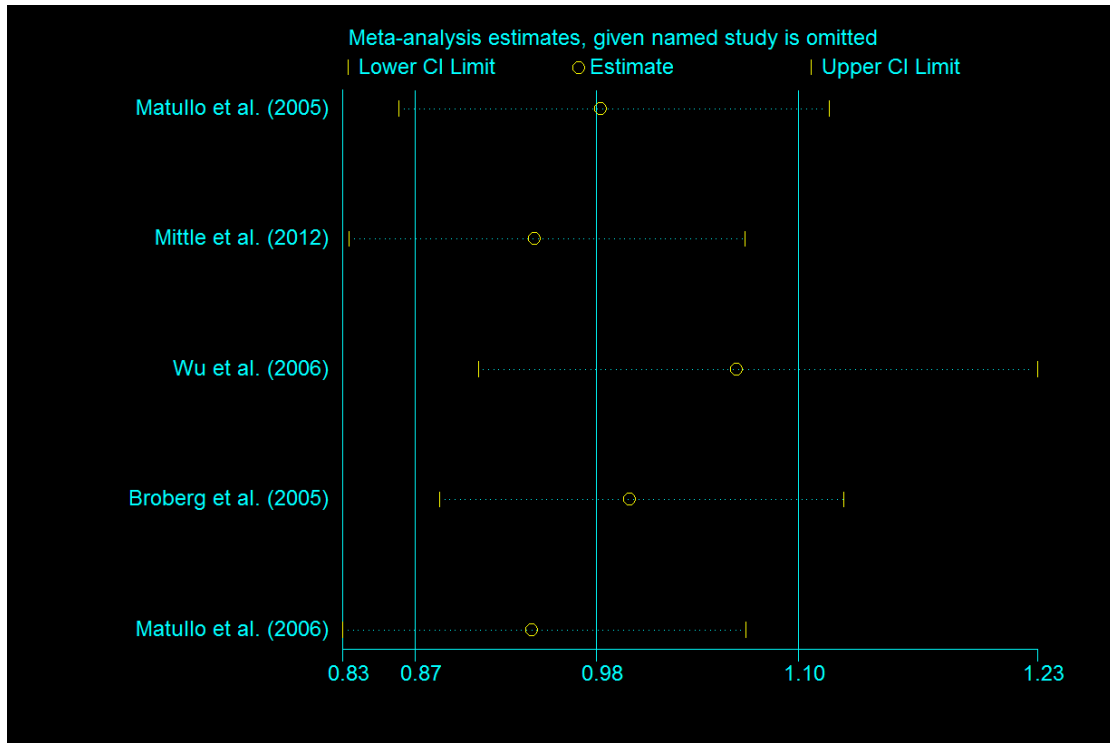

Supplementary figure 14. Sensitivity analysis for *XRCC4*-rs1805377 polymorphism and the risk of urological neoplasms (allelic comparison B vs. A).

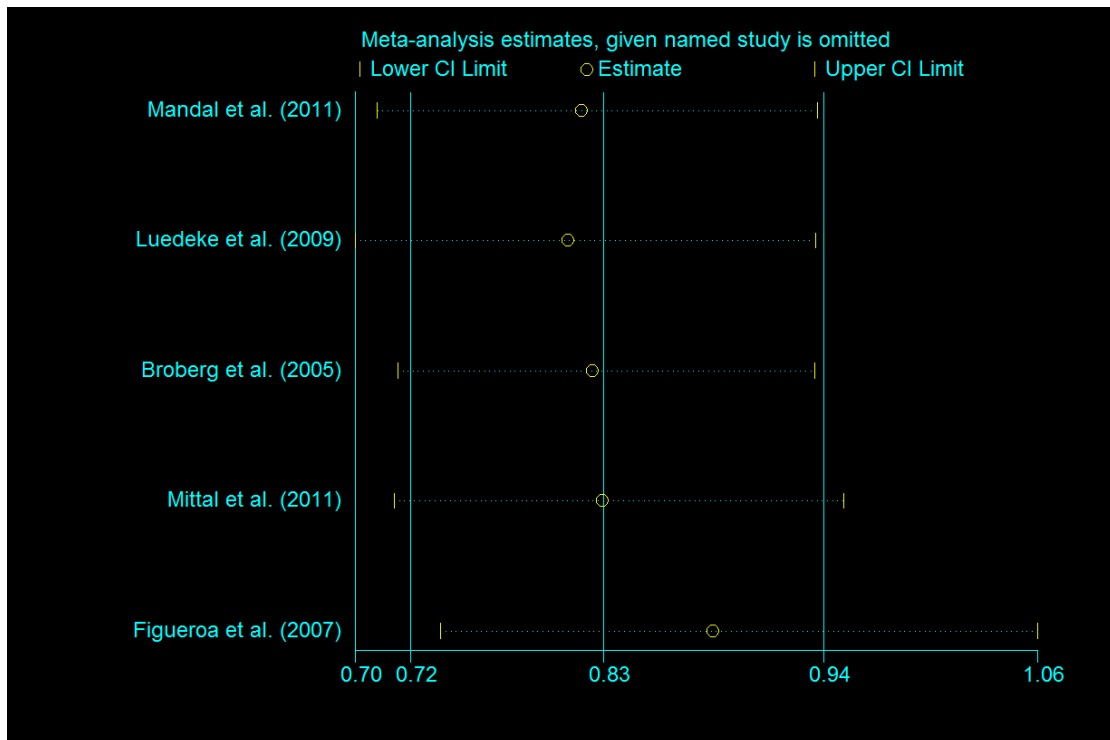

Supplementary figure 15. Sensitivity analysis for *XRCC4*-rs6869366 polymorphism and the risk of urological neoplasms (allelic comparison B vs. A).

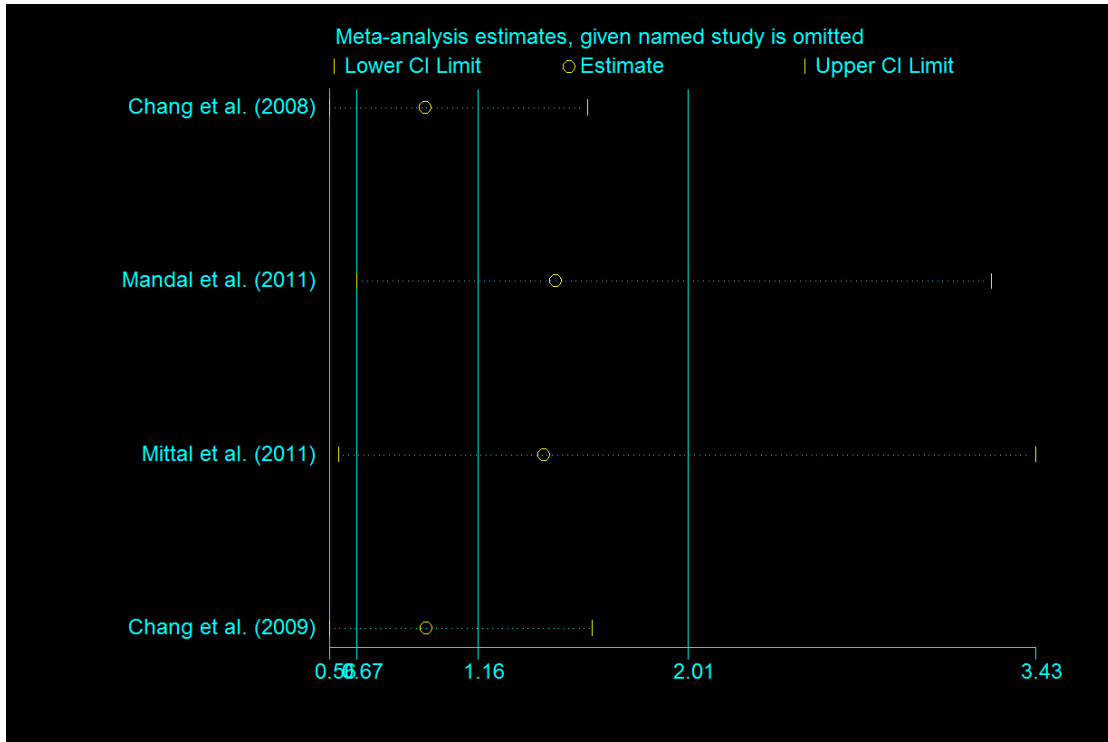

Supplementary figure 16. Sensitivity analysis for *XRCC4*-rs28360071 polymorphism and the risk of urological neoplasms (allelic comparison B vs. A).

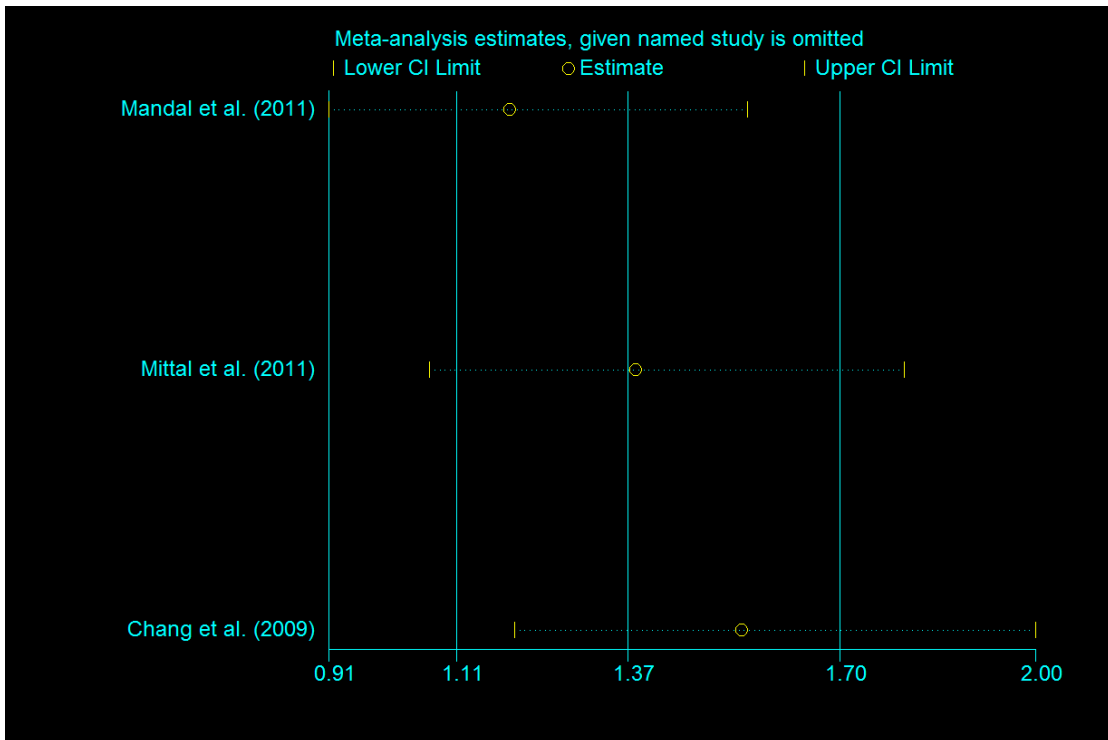



Supplementary figure 17. Sensitivity analysis for XRCC7-rs7003908 polymorphism and the risk of urological neoplasms (allelic comparison B vs. A).

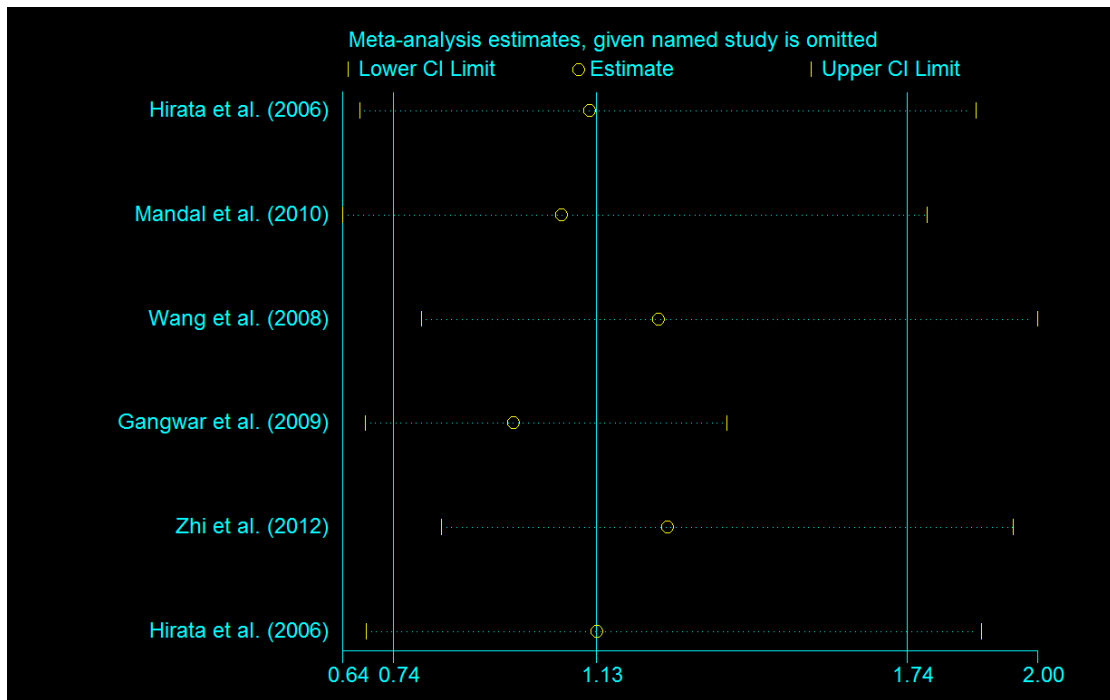

**Supplementary figure 18. Begg's funnel plot for publication bias under *XRCCI*-rs25487 polymorphism (allelic comparison B vs. A).** The x-axis log (OR) and the y-axis is natural logarithm of OR. The horizontal line in the figure represents the overall estimated log (OR). The two diagonal lines indicate the pseudo 95% confidence limits of the effect estimate. Log (OR) = log-transformed OR, OR = odds ratio.

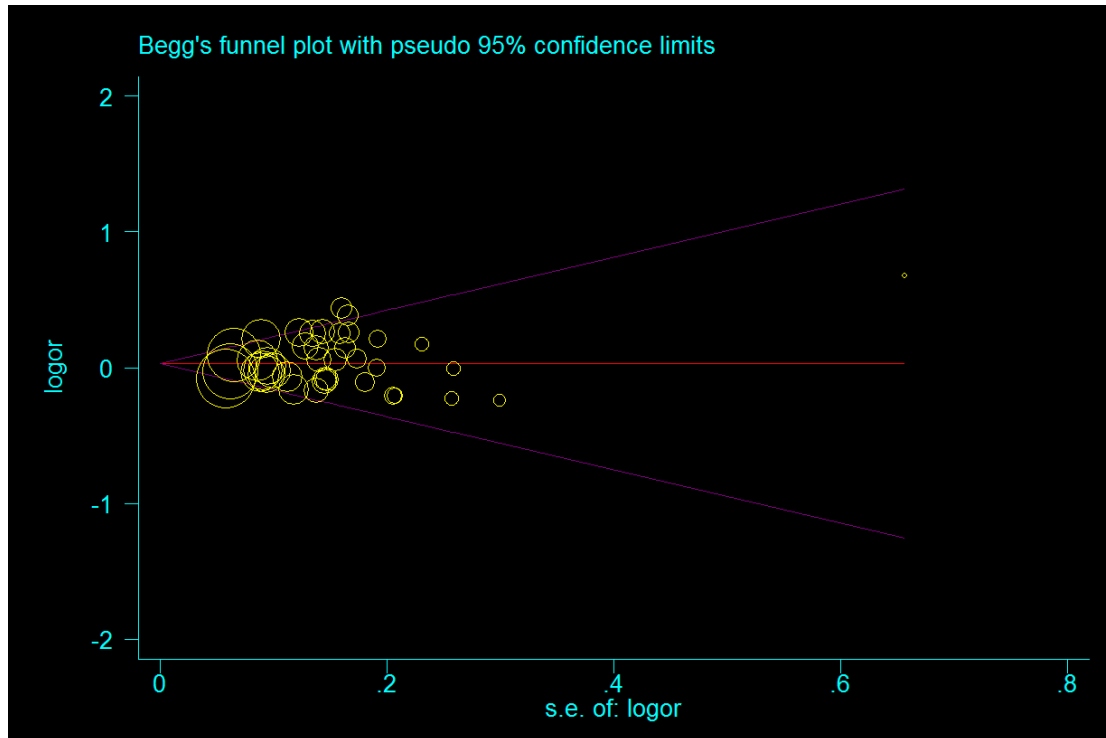

**Supplementary figure 19. Begg's funnel plot for publication bias under *XRCCI*-rs25489 polymorphism (allelic comparison B vs. A).** The x-axis log (OR) and the y-axis is natural logarithm of OR. The horizontal line in the figure represents the overall estimated log (OR). The two diagonal lines indicate the pseudo 95% confidence limits of the effect estimate. Log (OR) = log-transformed OR, OR = odds ratio.

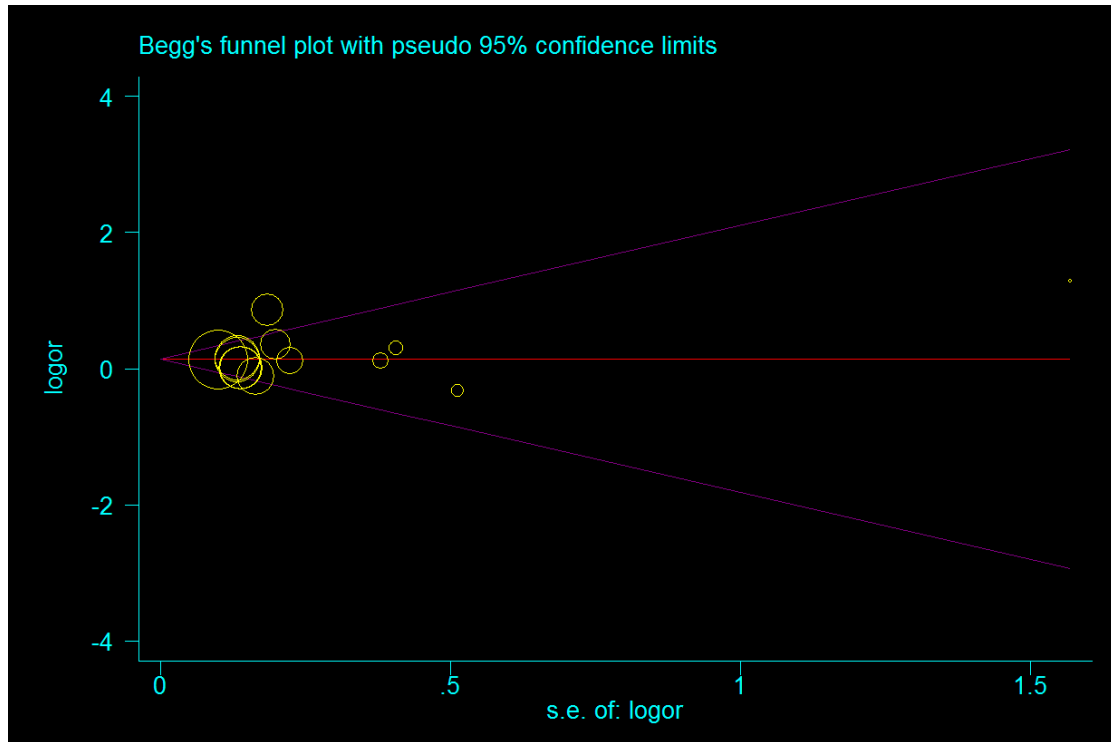

**Supplementary figure 20. Begg's funnel plot for publication bias under XRCCI-rs915927 polymorphism (allelic comparison B vs. A).** The x-axis log (OR) and the y-axis is natural logarithm of OR. The horizontal line in the figure represents the overall estimated log (OR). The two diagonal lines indicate the pseudo 95% confidence limits of the effect estimate. Log (OR) = log-transformed OR, OR = odds ratio.

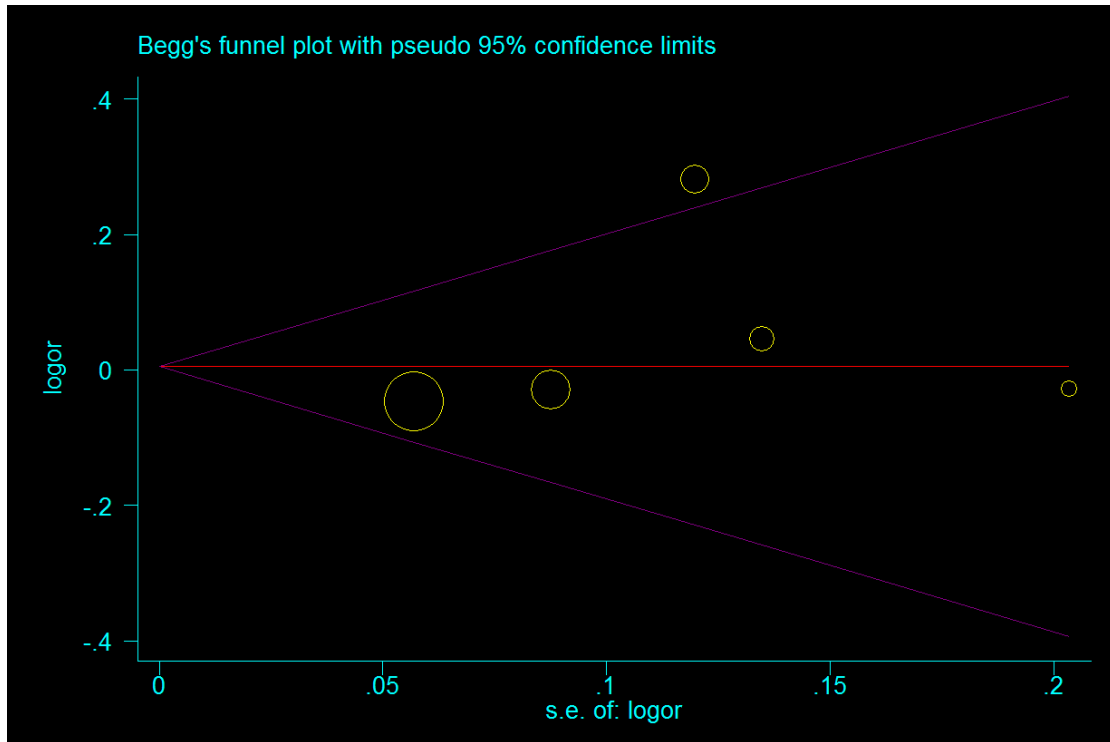

**Supplementary figure 21. Begg's funnel plot for publication bias under XRCCI-rs1799782 polymorphism (allelic comparison B vs. A).** The x-axis log (OR) and the y-axis is natural logarithm of OR. The horizontal line in the figure represents the overall estimated log (OR). The two diagonal lines indicate the pseudo 95% confidence limits of the effect estimate. Log (OR) = log-transformed OR, OR = odds ratio.

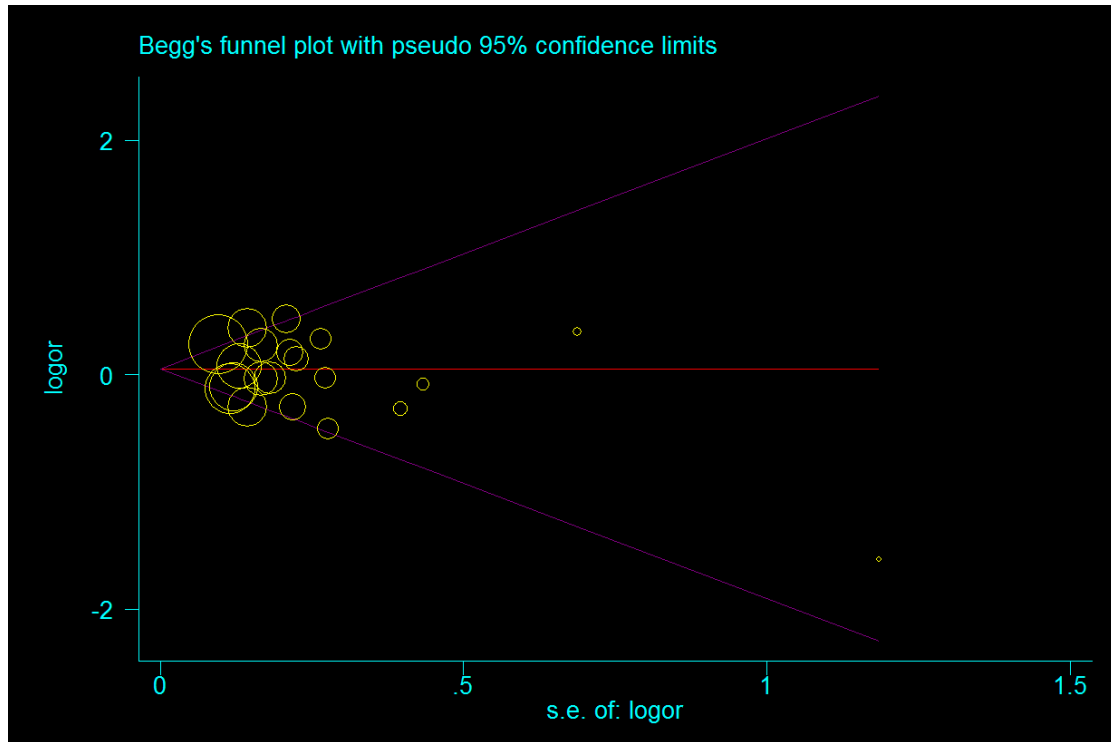

**Supplementary figure 22. Begg's funnel plot for publication bias under XRCCI-rs3213245 polymorphism (allelic comparison B vs. A).** The x-axis log (OR) and the y-axis is natural logarithm of OR. The horizontal line in the figure represents the overall estimated log (OR). The two diagonal lines indicate the pseudo 95% confidence limits of the effect estimate. Log (OR) = log-transformed OR, OR = odds ratio.

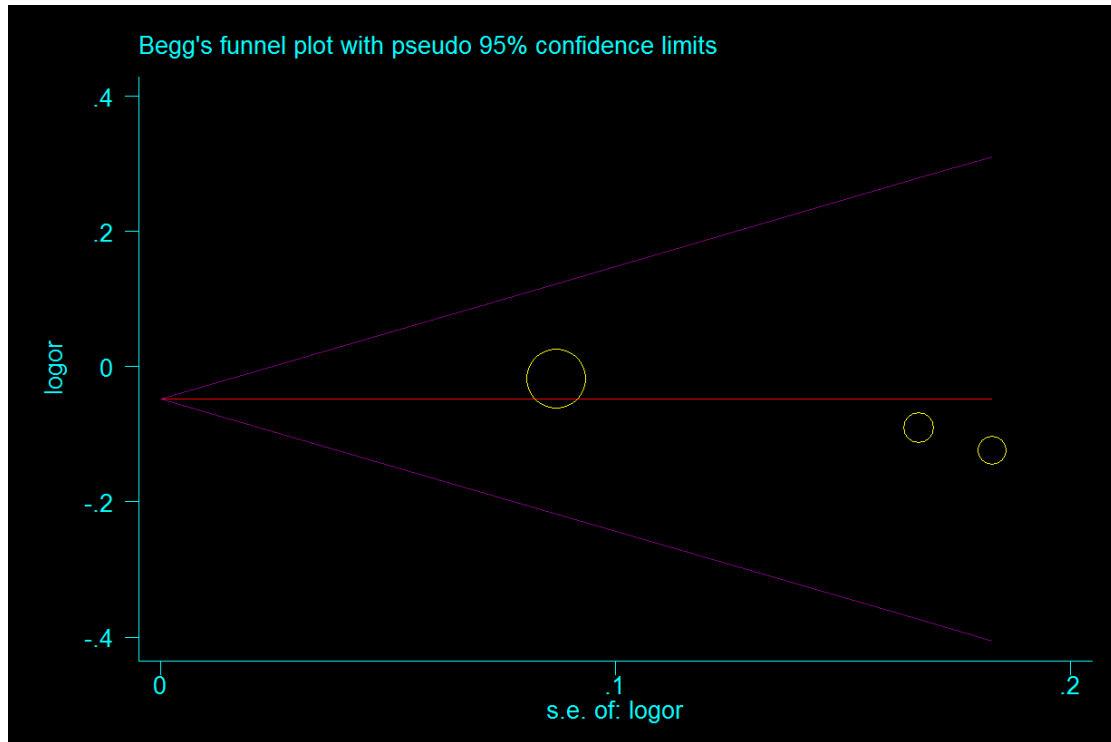

**Supplementary figure 23. Begg's funnel plot for publication bias under XRCC2-rs3218536 polymorphism (allelic comparison B vs. A).** The x-axis log (OR) and the y-axis is natural logarithm of OR. The horizontal line in the figure represents the overall estimated log (OR). The two diagonal lines indicate the pseudo 95% confidence limits of the effect estimate. Log (OR) = log-transformed OR, OR = odds ratio.

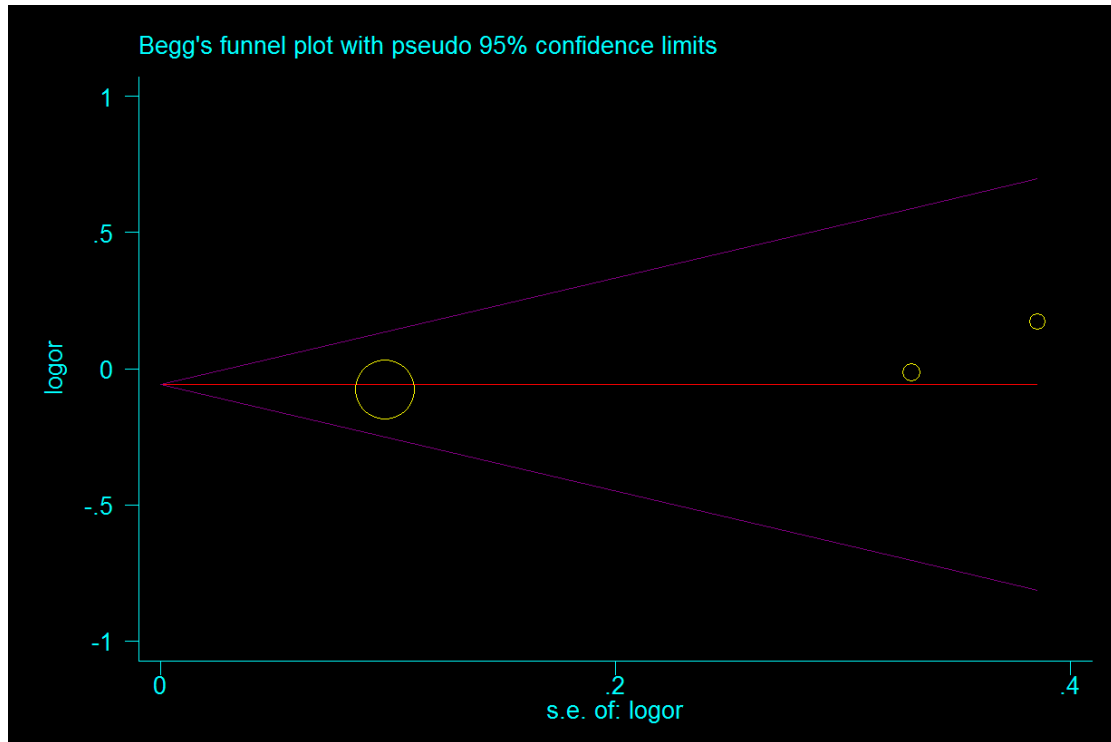

**Supplementary figure 24. Begg's funnel plot for publication bias under XRCC3-rs861539 (allelic comparison B vs. A).** The x-axis log (OR) and the y-axis is natural logarithm of OR. The horizontal line in the figure represents the overall estimated log (OR). The two diagonal lines indicate the pseudo 95% confidence limits of the effect estimate. Log (OR) = log-transformed OR, OR = odds ratio.

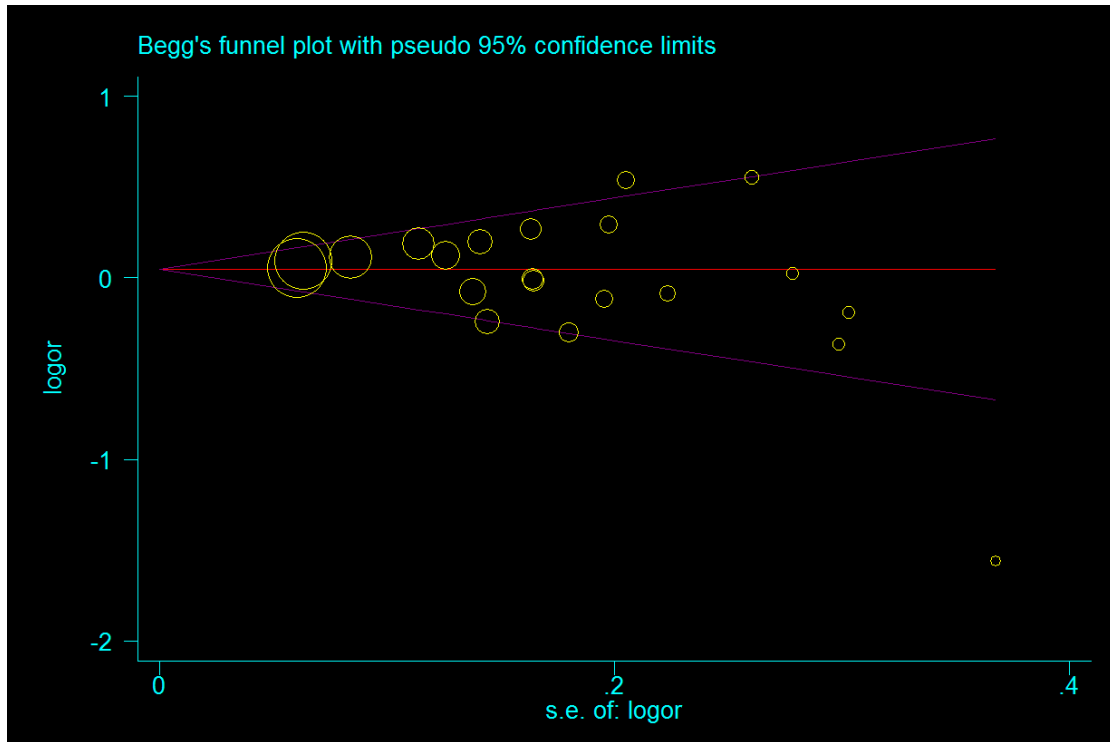



**Supplementary figure 25. Begg's funnel plot for publication bias under XRCC3-rs1799796 polymorphism (allelic comparison B vs. A).** The x-axis log (OR) and the y-axis is natural logarithm of OR. The horizontal line in the figure represents the overall estimated log (OR). The two diagonal lines indicate the pseudo 95% confidence limits of the effect estimate. Log (OR) = log-transformed OR, OR = odds ratio.

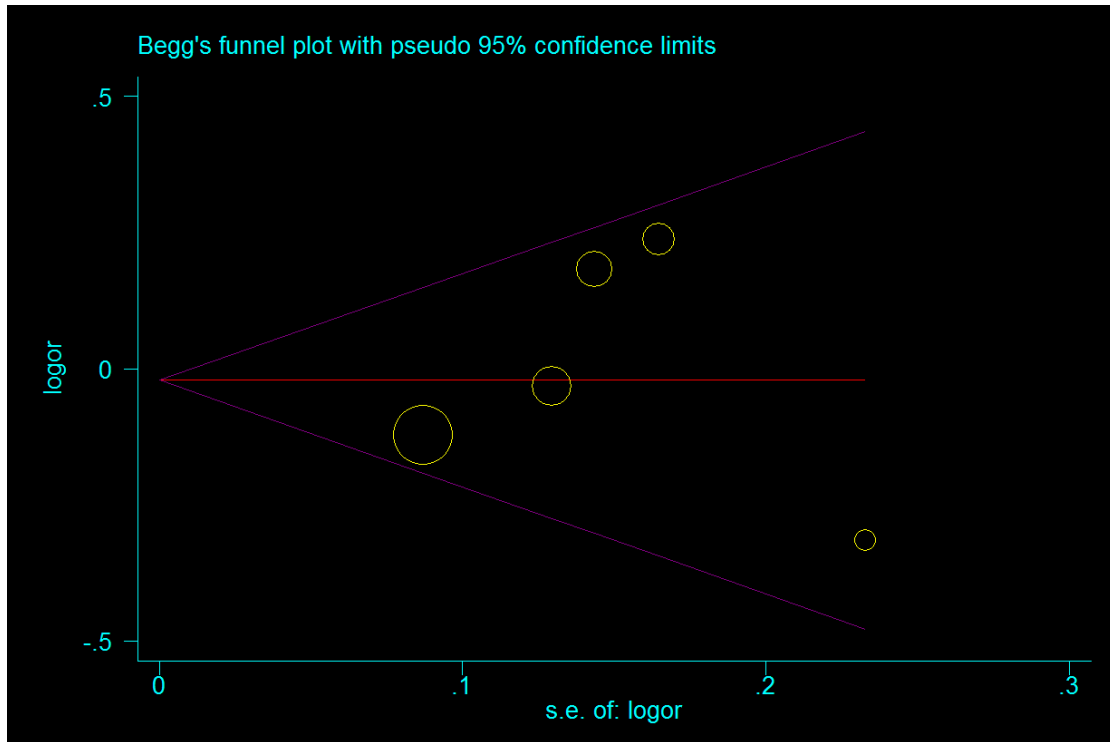

**Supplementary figure 26. Begg's funnel plot for publication bias under *XRCC4*-rs1805377 polymorphism (allelic comparison B vs. A).** The x-axis is  $\log(OR)$  and the y-axis is natural logarithm of OR. The horizontal line in the figure represents the overall estimated  $\log(OR)$ . The two diagonal lines indicate the pseudo 95% confidence limits of the effect estimate.  $\log(OR) = \ln(OR)$ , OR = odds ratio.

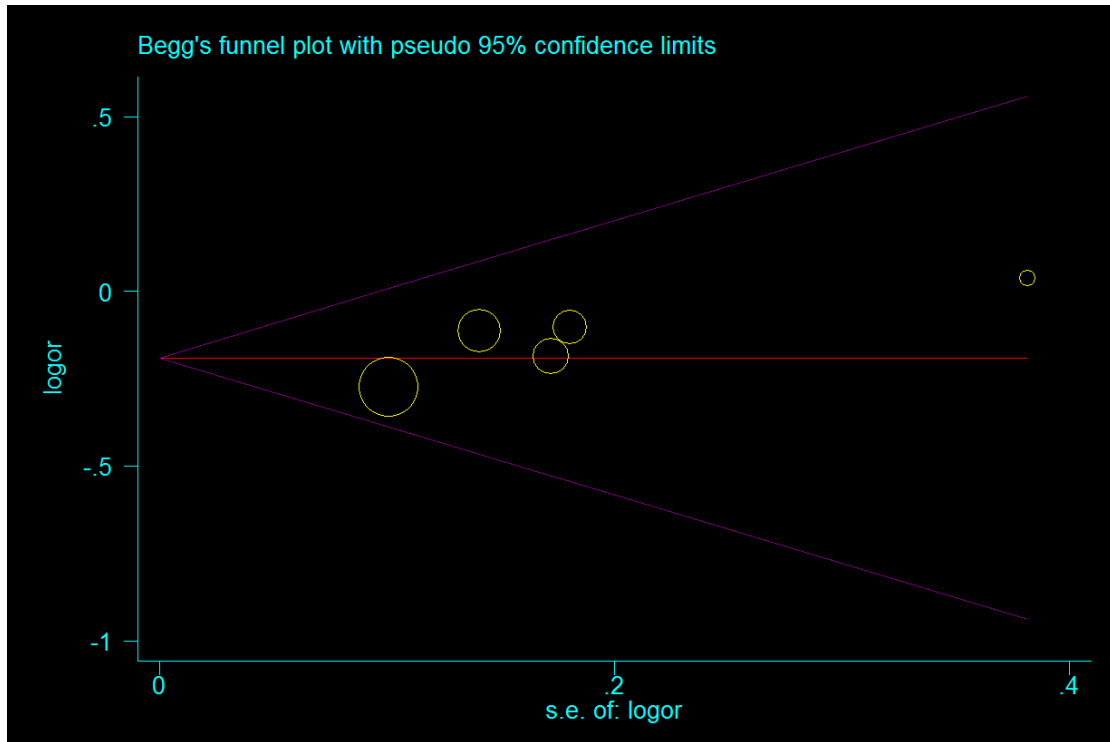

**Supplementary figure 27. Begg's funnel plot for publication bias under *XRCC4*-rs6869366 polymorphism (allelic comparison B vs. A).** The x-axis is  $\log(OR)$  and the y-axis is natural logarithm of OR. The horizontal line in the figure represents the overall estimated  $\log(OR)$ . The two diagonal lines indicate the pseudo 95% confidence limits of the effect estimate.  $\log(OR) = \log$ -transformed OR, OR = odds ratio.

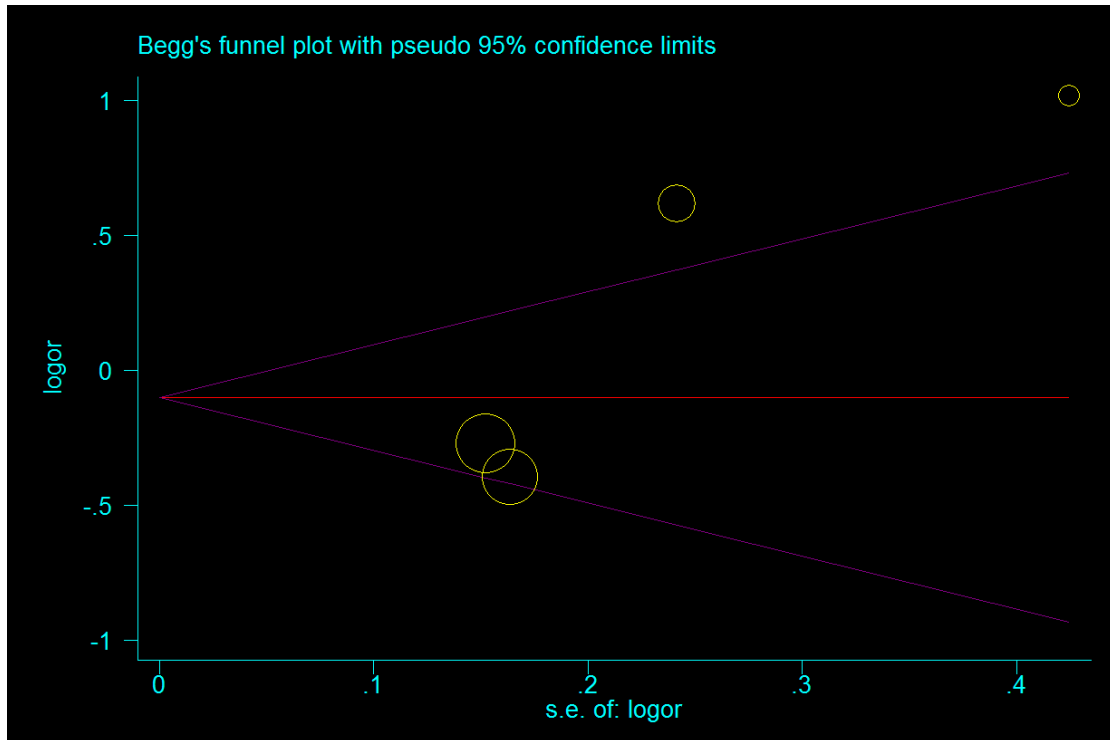

**Supplementary figure 28. Begg's funnel plot for publication bias under *XRCC4*-rs28360071 polymorphism (allelic comparison B vs. A).** The x-axis is  $\log(OR)$  and the y-axis is natural logarithm of  $OR$ . The horizontal line in the figure represents the overall estimated  $\log(OR)$ . The two diagonal lines indicate the pseudo 95% confidence limits of the effect estimate.  $\log(OR) = \log$ -transformed  $OR$ ,  $OR =$  odds ratio.

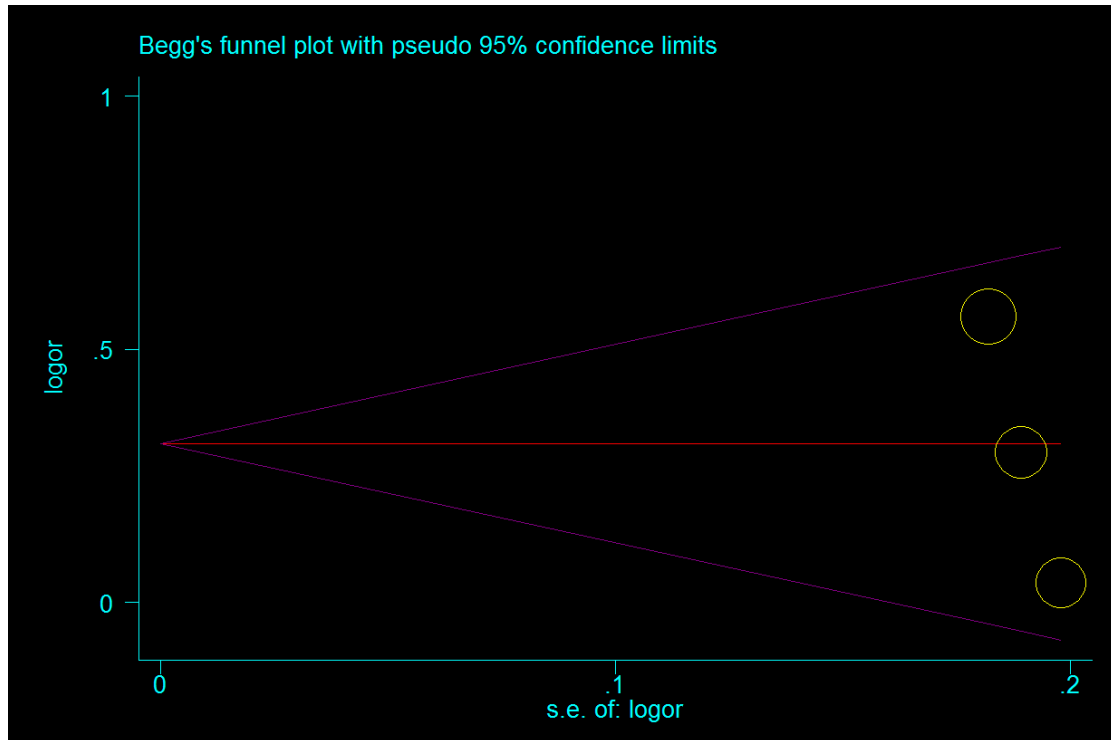

**Supplementary figure 29. Begg's funnel plot for publication bias under XRCC7-rs7003908 polymorphism (allelic comparison B vs. A).** The x-axis log (OR) and the y-axis is natural logarithm of OR. The horizontal line in the figure represents the overall estimated log (OR). The two diagonal lines indicate the pseudo 95% confidence limits of the effect estimate. Log (OR) = log-transformed OR, OR = odds ratio.

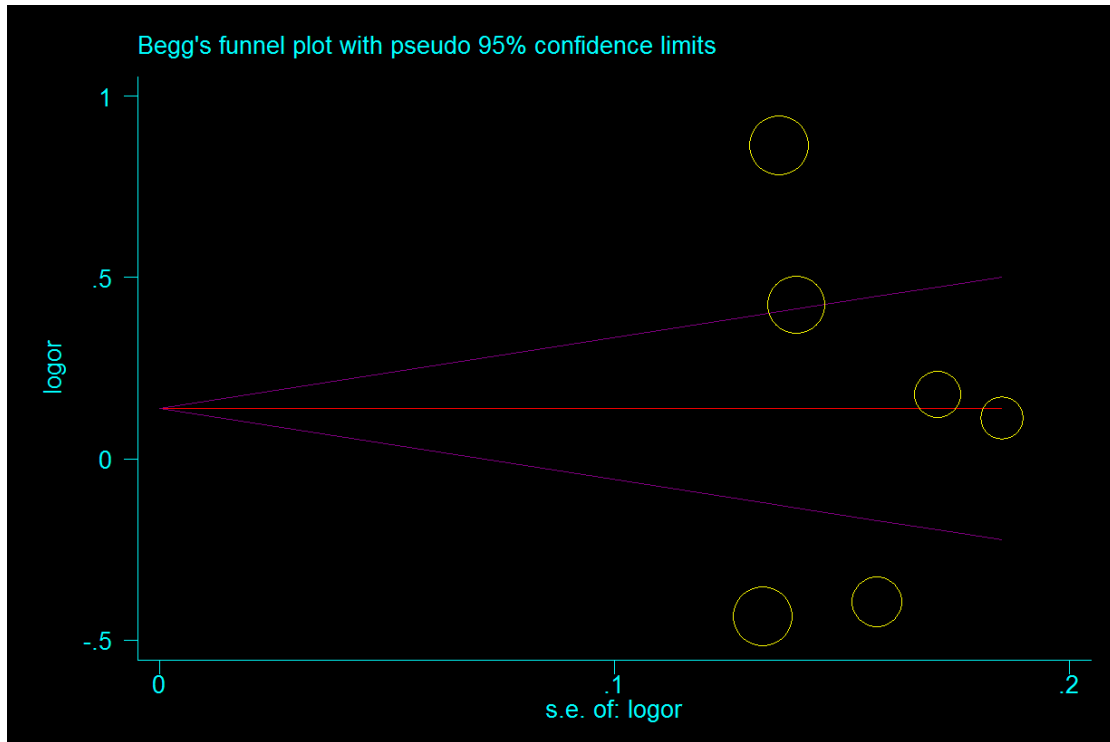

**Supplementary figure 30. Linkage disequilibrium analyses for *XRCC1* polymorphisms in populations from 1000 genomes.** The number of each cell represents  $r^2$  and white color cells shows no LD between polymorphisms. Population descriptors: CEU: Utah residents with Northern and Western European ancestry from the CEPH collection; CHB: Han Chinese in Beijing, China; JPT: Japanese in Tokyo, Japan; YRI: Yoruba in Ibadan, Nigeria. The rs numbers are SNP IDs taken from National Center for Biotechnology Information (NCBI).

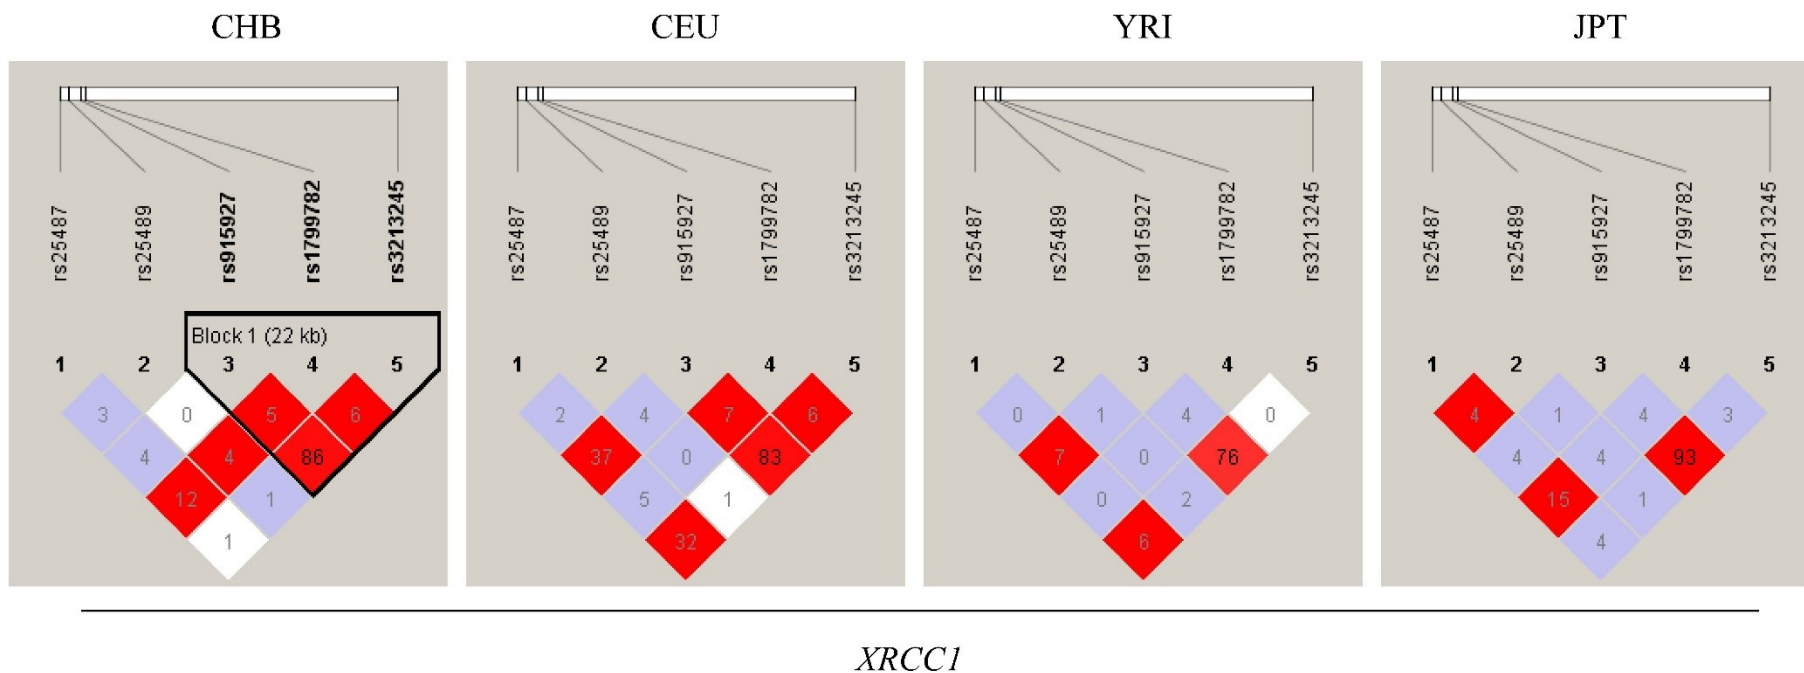

**Supplementary figure 31. Linkage disequilibrium analyses for *XRCC3* and *XRCC4***

**polymorphisms in populations from 1000 genomes.** The number of each cell represents  $r^2$  and white color cells shows no LD between polymorphisms. Population descriptors: CEU: Utah residents with Northern and Western European ancestry from the CEPH collection; CHB: Han Chinese in Beijing, China; JPT: Japanese in Tokyo, Japan; YRI: Yoruba in Ibadan, Nigeria. The rs numbers are SNP IDs taken from National Center for Biotechnology Information (NCBI).

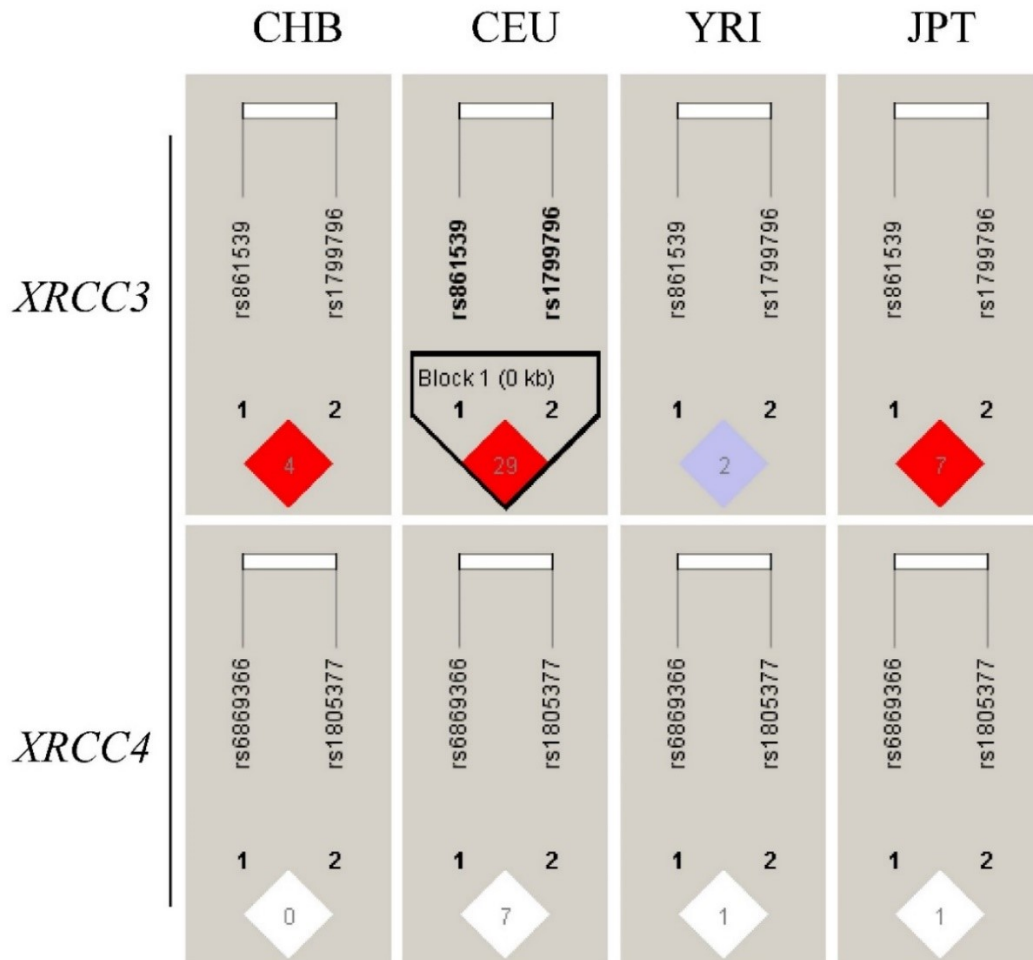

**Supplementary table 1.** Search strategies for each gene and the finally eligible articles included.

| <b>Gene</b>  | <b>Search Strategy</b>                                                                                                                                           | <b>Eligible Publications</b> | <b>Eligible Studies</b> |
|--------------|------------------------------------------------------------------------------------------------------------------------------------------------------------------|------------------------------|-------------------------|
| <i>XRCC1</i> | (X-Ray Repair Cross Complementing 1 OR <i>XRCC1</i> ) AND (polymorphism OR variation) AND (carcinoma OR cancer OR neoplasm OR adenocarcinoma OR tumor OR tumour) | 35                           | 80                      |
| <i>XRCC2</i> | (X-Ray Repair Cross Complementing 2 OR <i>XRCC2</i> ) AND (polymorphism OR variation) AND (carcinoma OR cancer OR neoplasm OR adenocarcinoma OR tumor OR tumour) | 3                            | 3                       |
| <i>XRCC3</i> | (X-Ray Repair Cross Complementing 3 OR <i>XRCC3</i> ) AND (polymorphism OR variation) AND (carcinoma OR cancer OR neoplasm OR adenocarcinoma OR tumor OR tumour) | 22                           | 29                      |
| <i>XRCC4</i> | (X-Ray Repair Cross Complementing 4 OR <i>XRCC4</i> ) AND (polymorphism OR variation) AND (carcinoma OR cancer OR neoplasm OR adenocarcinoma OR tumor OR tumour) | 6                            | 12                      |
| <i>XRCC7</i> | (X-Ray Repair Cross Complementing 7 OR <i>XRCC7</i> ) AND (polymorphism OR variation) AND (carcinoma OR cancer OR neoplasm OR adenocarcinoma OR tumor OR tumour) | 5                            | 6                       |



**Supplementary table 2.** Details of the sensitivity analyses for the polymorphisms in *XRCC* genes and the risk of urological neoplasms.

| <b>Polymorphism</b>    | <b>Comparison</b>     | <b>Study Omitted</b>  | <b>Estimate</b> | <b>[95% Confident Interval]</b> | <b>Effect Model</b> |        |
|------------------------|-----------------------|-----------------------|-----------------|---------------------------------|---------------------|--------|
| <i>XRCC1</i> -rs915927 | B vs. A               | <i>Sak et al.</i>     | 1.015           | 0.926-1.113                     | Fixed               |        |
|                        |                       | <i>Matullo et al.</i> | 1.001           | 0.919-1.090                     |                     |        |
|                        |                       | <i>Matullo et al.</i> | 0.968           | 0.888-1.055                     |                     |        |
|                        |                       | <i>Agalliu et al.</i> | 1.064           | 0.947-1.197                     |                     |        |
|                        | BA vs. AA             | <i>Agalliu et al.</i> | 1.006           | 0.927-1.093                     | Fixed               |        |
|                        |                       | <i>Sak et al.</i>     | 1.009           | 0.852-1.194                     |                     |        |
|                        |                       | <i>Matullo et al.</i> | 1.011           | 0.870-1.175                     |                     |        |
|                        |                       | <i>Matullo et al.</i> | 0.941           | 0.805-1.100                     |                     |        |
|                        |                       | <i>Agalliu et al.</i> | 1.078           | 0.888-1.309                     |                     |        |
|                        |                       | <i>Agalliu et al.</i> | 1.031           | 0.891-1.194                     |                     |        |
|                        | BA+BB vs. AA          | <i>Sak et al.</i>     | 1.022           | 0.872-1.197                     | Fixed               |        |
|                        |                       | <i>Matullo et al.</i> | 1.011           | 0.877-1.165                     |                     |        |
|                        |                       | <i>Matullo et al.</i> | 0.939           | 0.810-1.088                     |                     |        |
|                        |                       | <i>Agalliu et al.</i> | 1.094           | 0.912-1.312                     |                     |        |
|                        |                       | <i>Agalliu et al.</i> | 1.028           | 0.896-1.180                     |                     |        |
|                        | BB vs. AA             | <i>Sak et al.</i>     | 1.008           | 0.837-1.214                     | Fixed               |        |
|                        |                       | <i>Matullo et al.</i> | 0.981           | 0.825-1.166                     |                     |        |
|                        |                       | <i>Matullo et al.</i> | 0.923           | 0.774-1.100                     |                     |        |
|                        |                       | <i>Agalliu et al.</i> | 1.091           | 0.862-1.380                     |                     |        |
|                        |                       | <i>Agalliu et al.</i> | 1.000           | 0.846-1.183                     |                     |        |
| <i>Sak et al.</i>      |                       | 1.019                 | 0.885-1.172     |                                 |                     |        |
| BB vs. AA+AB           | <i>Matullo et al.</i> | 0.993                 | 0.867-1.136     | Fixed                           |                     |        |
|                        | <i>Matullo et al.</i> | 0.975                 | 0.852-1.115     |                                 |                     |        |
|                        | <i>Agalliu et al.</i> | 1.074                 | 0.882-1.308     |                                 |                     |        |
|                        | <i>Agalliu et al.</i> | 0.991                 | 0.869-1.130     |                                 |                     |        |
|                        | B vs. A               | <i>Sak et al.</i>     | 1.152           |                                 | 0.992-1.337         | Random |
|                        |                       | <i>Stern et al.</i>   | 1.173           |                                 | 1.012-1.360         |        |
| <i>Stern et al.</i>    |                       | 1.168                 | 1.012-1.347     |                                 |                     |        |
| <i>Figueroa et al.</i> |                       | 1.178                 | 1.004-1.383     |                                 |                     |        |

|              |                        |       |             |        |
|--------------|------------------------|-------|-------------|--------|
|              | Mittal <i>et al.</i>   | 1.194 | 1.023-1.394 |        |
|              | Mittal <i>et al.</i>   | 1.204 | 1.041-1.393 |        |
|              | Wang <i>et al.</i>     | 1.095 | 0.995-1.206 |        |
|              | Xu <i>et al.</i>       | 1.175 | 1.009-1.368 |        |
|              | vanGils <i>et al.</i>  | 1.166 | 1.007-1.350 |        |
|              | Agalliu <i>et al.</i>  | 1.172 | 0.999-1.376 |        |
|              | Agalliu <i>et al.</i>  | 1.181 | 1.023-1.363 |        |
|              | Mittal <i>et al.</i>   | 1.193 | 1.022-1.394 |        |
|              | Zhu <i>et al.</i>      | 1.178 | 0.998-1.392 |        |
| BA vs. AA    | Sak <i>et al.</i>      | 1.459 | 1.176-1.812 | Random |
|              | Stern <i>et al.</i>    | 1.481 | 1.205-1.821 |        |
|              | Stern <i>et al.</i>    | 1.455 | 1.192-1.776 |        |
|              | Figueroa <i>et al.</i> | 1.510 | 1.214-1.879 |        |
|              | Mittal <i>et al.</i>   | 1.430 | 1.161-1.761 |        |
|              | Mittal <i>et al.</i>   | 1.425 | 1.162-1.747 |        |
|              | Wang <i>et al.</i>     | 1.372 | 1.146-1.641 |        |
|              | Xu <i>et al.</i>       | 1.488 | 1.203-1.840 |        |
|              | vanGils <i>et al.</i>  | 1.465 | 1.192-1.802 |        |
|              | Agalliu <i>et al.</i>  | 1.508 | 1.211-1.879 |        |
|              | Agalliu <i>et al.</i>  | 1.492 | 1.224-1.819 |        |
|              | Mittal <i>et al.</i>   | 1.375 | 1.149-1.645 |        |
|              | Zhu <i>et al.</i>      | 1.523 | 1.234-1.879 |        |
| BA+BB vs. AA | Sak <i>et al.</i>      | 1.269 | 1.134-1.421 | Fixed  |
|              | Stern <i>et al.</i>    | 1.286 | 1.152-1.436 |        |
|              | Stern <i>et al.</i>    | 1.280 | 1.147-1.427 |        |
|              | Figueroa <i>et al.</i> | 1.310 | 1.163-1.475 |        |
|              | Mittal <i>et al.</i>   | 1.285 | 1.146-1.440 |        |
|              | Mittal <i>et al.</i>   | 1.290 | 1.153-1.444 |        |

|              |  |                       |       |             |       |
|--------------|--|-----------------------|-------|-------------|-------|
|              |  | Wang <i>et al.</i>    | 1.210 | 1.080-1.355 |       |
|              |  | Xu <i>et al.</i>      | 1.289 | 1.152-1.442 |       |
|              |  | vanGils <i>et al.</i> | 1.281 | 1.147-1.429 |       |
|              |  | Agalliu <i>et al.</i> | 1.304 | 1.158-1.469 |       |
|              |  | Agalliu <i>et al.</i> | 1.291 | 1.157-1.440 |       |
|              |  | Mittal <i>et al.</i>  | 1.263 | 1.127-1.415 |       |
|              |  | Zhu <i>et al.</i>     | 1.323 | 1.172-1.494 |       |
| BB vs. AA    |  | Sak <i>et al.</i>     | 0.994 | 0.802-1.232 | Fixed |
|              |  | Stern <i>et al.</i>   | 0.996 | 0.806-1.232 |       |
|              |  | Stern <i>et al.</i>   | 0.996 | 0.806-1.232 |       |
|              |  | Figuroa <i>et al.</i> | 0.997 | 0.804-1.237 |       |
|              |  | Mittal <i>et al.</i>  | 1.034 | 0.814-1.314 |       |
|              |  | Mittal <i>et al.</i>  | 1.053 | 0.836-1.328 |       |
|              |  | Wang <i>et al.</i>    | 0.955 | 0.770-1.184 |       |
|              |  | Xu <i>et al.</i>      | 1.000 | 0.807-1.239 |       |
|              |  | vanGils <i>et al.</i> | 0.996 | 0.806-1.232 |       |
|              |  | Agalliu <i>et al.</i> | 0.990 | 0.799-1.226 |       |
|              |  | Agalliu <i>et al.</i> | 0.996 | 0.806-1.232 |       |
|              |  | Mittal <i>et al.</i>  | 1.045 | 0.824-1.324 |       |
|              |  | Zhu <i>et al.</i>     | 0.899 | 0.692-1.168 |       |
| BB vs. AA+AB |  | Sak <i>et al.</i>     | 0.841 | 0.685-1.033 | Fixed |
|              |  | Stern <i>et al.</i>   | 0.844 | 0.689-1.035 |       |
|              |  | Stern <i>et al.</i>   | 0.844 | 0.689-1.035 |       |
|              |  | Figuroa <i>et al.</i> | 0.842 | 0.686-1.035 |       |
|              |  | Mittal <i>et al.</i>  | 0.878 | 0.697-1.104 |       |
|              |  | Mittal <i>et al.</i>  | 0.899 | 0.720-1.124 |       |
|              |  | Wang <i>et al.</i>    | 0.813 | 0.662-0.999 |       |

|                 |                    |                       |             |             |       |
|-----------------|--------------------|-----------------------|-------------|-------------|-------|
| XRCC1-rs3213245 | B vs. A            | Xu <i>et al.</i>      | 0.846       | 0.689-1.038 | Fixed |
|                 |                    | vanGils <i>et al.</i> | 0.844       | 0.689-1.035 |       |
|                 |                    | Agalliu <i>et al.</i> | 0.838       | 0.682-1.029 |       |
|                 |                    | Agalliu <i>et al.</i> | 0.844       | 0.689-1.035 |       |
|                 |                    | Mittal <i>et al.</i>  | 0.934       | 0.743-1.176 |       |
|                 |                    | Zhu <i>et al.</i>     | 0.714       | 0.557-0.916 |       |
|                 |                    | Wang <i>et al.</i>    | 0.966       | 0.831-1.124 |       |
|                 |                    | Sak <i>et al.</i>     | 0.899       | 0.706-1.144 |       |
|                 |                    | Zhi <i>et al.</i>     | 0.962       | 0.825-1.123 |       |
|                 | BA vs. AA          | Wang <i>et al.</i>    | 0.909       | 0.706-1.169 | Fixed |
|                 |                    | Sak <i>et al.</i>     | 0.788       | 0.596-1.042 |       |
|                 |                    | Zhi <i>et al.</i>     | 0.911       | 0.704-1.180 |       |
|                 | BA+BB vs. AA       | Wang <i>et al.</i>    | 0.926       | 0.728-1.177 | Fixed |
|                 |                    | Sak <i>et al.</i>     | 0.831       | 0.634-1.089 |       |
|                 |                    | Zhi <i>et al.</i>     | 0.922       | 0.719-1.181 |       |
|                 | BB vs. AA          | Wang <i>et al.</i>    | 1.015       | 0.726-1.421 | Fixed |
|                 |                    | Sak <i>et al.</i>     | 1.621       | 0.664-3.957 |       |
|                 |                    | Zhi <i>et al.</i>     | 1.004       | 0.710-1.421 |       |
| BB vs. AA+AB    | Wang <i>et al.</i> | 0.991                 | 0.775-1.266 | Fixed       |       |
|                 | Sak <i>et al.</i>  | 1.715                 | 0.704-4.174 |             |       |
|                 | Zhi <i>et al.</i>  | 0.982                 | 0.765-1.261 |             |       |
| XRCC1-rs25487   | B vs. A            | Figuroa <i>et al.</i> | 1.025       | 0.985-1.066 | Fixed |
|                 |                    | Matullo <i>et al.</i> | 1.033       | 0.994-1.072 |       |
|                 |                    | Stern <i>et al.</i>   | 1.030       | 0.992-1.069 |       |
|                 |                    | Stern <i>et al.</i>   | 1.032       | 0.994-1.072 |       |
|                 |                    | Mittal <i>et al.</i>  | 1.026       | 0.988-1.065 |       |
|                 |                    | Arizono <i>et al.</i> | 1.033       | 0.995-1.073 |       |

|                        |       |              |
|------------------------|-------|--------------|
| Mittal <i>et al.</i>   | 1.027 | 0.989-1.067  |
| Sak <i>et al.</i>      | 1.034 | 0.995-1.074  |
| Sanyal <i>et al.</i>   | 1.027 | 0.989-1.067  |
| Matullo <i>et al.</i>  | 1.036 | 0.997-1.076  |
| Fontana <i>et al.</i>  | 1.032 | 0.994-1.071  |
| Broberg <i>et al.</i>  | 1.029 | 0.992-1.069  |
| Matullo <i>et al.</i>  | 1.030 | 0.992-1.069  |
| Shen <i>et al.</i>     | 1.033 | 0.994-1.072  |
| Ramaniuk <i>et al.</i> | 1.033 | 0.995-1.073  |
| Zhi <i>et al.</i>      | 1.025 | 0.987-1.064  |
| Wang <i>et al.</i>     | 1.034 | 0.996-1.074  |
| Andrew <i>et al.</i>   | 1.037 | 0.997-1.078  |
| Kelsey <i>et al.</i>   | 1.032 | 0.994-1.072  |
| Huang <i>et al.</i>    | 1.030 | 0.991-1.070  |
| Gao <i>et al.</i>      | 1.027 | 0.989-1.067  |
| Hamano <i>et al.</i>   | 1.031 | 0.993-1.070  |
| Berhane <i>et al.</i>  | 1.026 | 0.988-1.065  |
| Mittal <i>et al.</i>   | 1.028 | 0.990-1.068  |
| Abe <i>et al.</i>      | 1.031 | 0.993-1.072  |
| vanGils <i>et al.</i>  | 1.033 | 0.995-1.072  |
| Xu <i>et al.</i>       | 1.024 | 0.987-1.064  |
| Ritchey <i>et al.</i>  | 1.029 | 0.991- 1.068 |
| Hirata <i>et al.</i> . | 1.030 | 0.992-1.070  |
| Dhillon <i>et al.</i>  | 1.032 | 0.994-1.072  |
| Kuasne <i>et al.</i>   | 1.030 | 0.992-1.070  |
| Zhu <i>et al.</i>      | 1.022 | 0.983-1.062  |
| Chen <i>et al.</i>     | 1.031 | 0.993-1.070  |

|           |                        |       |             |       |
|-----------|------------------------|-------|-------------|-------|
|           | Chen <i>et al.</i>     | 1.026 | 0.988-1.066 |       |
|           | Rybicki <i>et al.</i>  | 1.034 | 0.995-1.074 |       |
|           | Rybicki <i>et al.</i>  | 1.033 | 0.994-1.073 |       |
|           | Agalliu <i>et al.</i>  | 1.044 | 1.003-1.086 |       |
|           | Agalliu <i>et al.</i>  | 1.032 | 0.994-1.071 |       |
|           | Hirata <i>et al.</i>   | 1.029 | 0.991-1.068 |       |
| BA vs. AA | Figuroa <i>et al.</i>  | 1.027 | 0.971-1.086 | Fixed |
|           | Matullo <i>et al.</i>  | 1.034 | 0.980-1.091 |       |
|           | Stern <i>et al.</i>    | 1.031 | 0.977-1.088 |       |
|           | Stern <i>et al.</i>    | 1.032 | 0.977-1.089 |       |
|           | Mittal <i>et al.</i>   | 1.025 | 0.971-1.083 |       |
|           | Arizono <i>et al.</i>  | 1.030 | 0.975-1.087 |       |
|           | Mittal <i>et al.</i>   | 1.025 | 0.971-1.082 |       |
|           | Sak <i>et al.</i>      | 1.034 | 0.979-1.092 |       |
|           | Sanyal <i>et al.</i>   | 1.027 | 0.972-1.084 |       |
|           | Matullo <i>et al.</i>  | 1.038 | 0.983-1.096 |       |
|           | Fontana <i>et al.</i>  | 1.032 | 0.977-1.089 |       |
|           | Broberg <i>et al.</i>  | 1.029 | 0.975-1.086 |       |
|           | Matullo <i>et al.</i>  | 1.033 | 0.978-1.091 |       |
|           | Shen <i>et al.</i>     | 1.035 | 0.980-1.093 |       |
|           | Ramaniuk <i>et al.</i> | 1.033 | 0.978-1.091 |       |
|           | Zhi <i>et al.</i>      | 1.026 | 0.971-1.083 |       |
|           | Wang <i>et al.</i>     | 1.039 | 0.984-1.097 |       |
|           | Andrew <i>et al.</i>   | 1.026 | 0.969-1.085 |       |
|           | Kelsey <i>et al.</i>   | 1.021 | 0.966-1.078 |       |
|           | Huang <i>et al.</i>    | 1.031 | 0.976-1.090 |       |
|           | Gao <i>et al.</i>      | 1.031 | 0.977-1.089 |       |

|              |                        |       |             |       |
|--------------|------------------------|-------|-------------|-------|
|              | Hamano <i>et al.</i>   | 1.033 | 0.979-1.091 |       |
|              | Berhane <i>et al.</i>  | 1.031 | 0.976-1.088 |       |
|              | Mittal <i>et al.</i>   | 1.037 | 0.982-1.095 |       |
|              | Abe <i>et al.</i>      | 1.035 | 0.980-1.093 |       |
|              | vanGils <i>et al.</i>  | 1.034 | 0.980-1.092 |       |
|              | Xu <i>et al.</i>       | 1.023 | 0.969-1.080 |       |
|              | Ritchey <i>et al.</i>  | 1.036 | 0.981-1.093 |       |
|              | Hirata <i>et al.</i> . | 1.034 | 0.979-1.092 |       |
|              | Dhillon <i>et al.</i>  | 1.034 | 0.980-1.092 |       |
|              | Kuasne <i>et al.</i>   | 1.038 | 0.984-1.096 |       |
|              | Zhu <i>et al.</i>      | 1.028 | 0.973-1.086 |       |
|              | Chen <i>et al.</i>     | 1.032 | 0.978-1.090 |       |
|              | Chen <i>et al.</i>     | 1.027 | 0.972-1.084 |       |
|              | Rybicki <i>et al.</i>  | 1.037 | 0.981-1.095 |       |
|              | Rybicki <i>et al.</i>  | 1.035 | 0.979-1.093 |       |
|              | Agalliu <i>et al.</i>  | 1.048 | 0.990-1.110 |       |
|              | Agalliu <i>et al.</i>  | 1.035 | 0.981-1.093 |       |
|              | Hirata <i>et al.</i> . | 1.036 | 0.981-1.093 |       |
| BA+BB vs. AA | Figuroa <i>et al.</i>  | 1.033 | 0.979-1.089 | Fixed |
|              | Matullo <i>et al.</i>  | 1.042 | 0.990-1.096 |       |
|              | Stern <i>et al.</i>    | 1.038 | 0.986-1.092 |       |
|              | Stern <i>et al.</i>    | 1.040 | 0.988-1.095 |       |
|              | Mittal <i>et al.</i>   | 1.032 | 0.981-1.087 |       |
|              | Arizono <i>et al.</i>  | 1.040 | 0.988-1.095 |       |
|              | Mittal <i>et al.</i>   | 1.033 | 0.981-1.087 |       |
|              | Sak <i>et al.</i>      | 1.042 | 0.989-1.098 |       |
|              | Sanyal <i>et al.</i>   | 1.034 | 0.982-1.089 |       |
|              | Matullo <i>et al.</i>  | 1.046 | 0.994-1.102 |       |

|                        |       |             |
|------------------------|-------|-------------|
| Fontana <i>et al.</i>  | 1.040 | 0.988-1.094 |
| Broberg <i>et al.</i>  | 1.037 | 0.985-1.091 |
| Matullo <i>et al.</i>  | 1.039 | 0.987-1.094 |
| Shen <i>et al.</i>     | 1.042 | 0.990-1.097 |
| Ramaniuk <i>et al.</i> | 1.042 | 0.989-1.097 |
| Zhi <i>et al.</i>      | 1.032 | 0.980-1.087 |
| Wang <i>et al.</i>     | 1.046 | 0.994-1.101 |
| Andrew <i>et al.</i>   | 1.039 | 0.985-1.096 |
| Kelsey <i>et al.</i>   | 1.033 | 0.981-1.088 |
| Huang <i>et al.</i>    | 1.038 | 0.985-1.094 |
| Gao <i>et al.</i>      | 1.037 | 0.985-1.091 |
| Hamano <i>et al.</i>   | 1.040 | 0.989-1.095 |
| Berhane <i>et al.</i>  | 1.035 | 0.984-1.090 |
| Mittal. <i>et al.</i>  | 1.041 | 0.989-1.096 |
| Abe <i>et al.</i>      | 1.042 | 0.989-1.097 |
| vanGils <i>et al.</i>  | 1.042 | 0.990-1.097 |
| Xu <i>et al.</i>       | 1.030 | 0.978-1.084 |
| Ritchey <i>et al.</i>  | 1.040 | 0.988-1.095 |
| Hirata <i>et al.</i> . | 1.040 | 0.988-1.095 |
| Dhillon <i>et al.</i>  | 1.042 | 0.990-1.096 |
| Kuasne <i>et al.</i>   | 1.043 | 0.990-1.097 |
| Zhu <i>et al.</i>      | 1.031 | 0.979-1.087 |
| Chen <i>et al.</i>     | 1.040 | 0.988-1.094 |
| Chen <i>et al.</i>     | 1.033 | 0.981-1.088 |
| Rybicki <i>et al.</i>  | 1.044 | 0.991-1.100 |
| Rybicki <i>et al.</i>  | 1.042 | 0.990-1.098 |
| Agalliu <i>et al.</i>  | 1.057 | 1.002-1.116 |



|           |                        |       |             |       |
|-----------|------------------------|-------|-------------|-------|
|           | Agalliu <i>et al.</i>  | 1.042 | 0.990-1.097 |       |
|           | Hirata <i>et al.</i>   | 1.040 | 0.988-1.095 |       |
| BB vs. AA | Figuroa <i>et al.</i>  | 1.040 | 0.954-1.132 | Fixed |
|           | Matullo <i>et al.</i>  | 1.057 | 0.973-1.147 |       |
|           | Stern <i>et al.</i>    | 1.052 | 0.970-1.142 |       |
|           | Stern <i>et al.</i>    | 1.059 | 0.975-1.150 |       |
|           | Mittal <i>et al.</i>   | 1.043 | 0.960-1.133 |       |
|           | Arizono <i>et al.</i>  | 1.062 | 0.978-1.153 |       |
|           | Mittal <i>et al.</i>   | 1.046 | 0.963-1.136 |       |
|           | Sak <i>et al.</i>      | 1.060 | 0.974-1.152 |       |
|           | Sanyal <i>et al.</i>   | 1.048 | 0.965-1.139 |       |
|           | Matullo <i>et al.</i>  | 1.063 | 0.978-1.155 |       |
|           | Fontana <i>et al.</i>  | 1.056 | 0.973-1.146 |       |
|           | Broberg <i>et al.</i>  | 1.053 | 0.970-1.143 |       |
|           | Matullo <i>et al.</i>  | 1.050 | 0.966-1.140 |       |
|           | Shen <i>et al.</i>     | 1.056 | 0.972-1.146 |       |
|           | Ramaniuk <i>et al.</i> | 1.060 | 0.975-1.152 |       |
|           | Zhi <i>et al.</i>      | 1.042 | 0.959-1.131 |       |
|           | Wang <i>et al.</i>     | 1.057 | 0.973-1.148 |       |
|           | Andrew <i>et al.</i>   | 1.076 | 0.987-1.173 |       |
|           | Kelsey <i>et al.</i>   | 1.067 | 0.981-1.160 |       |
|           | Huang <i>et al.</i>    | 1.050 | 0.966-1.142 |       |
|           | Gao <i>et al.</i>      | 1.044 | 0.961-1.134 |       |
|           | Hamano <i>et al.</i>   | 1.054 | 0.971-1.145 |       |
|           | Berhane <i>et al.</i>  | 1.040 | 0.957-1.129 |       |
|           | Mittal <i>et al.</i>   | 1.044 | 0.960-1.134 |       |
|           | Abe <i>et al.</i>      | 1.052 | 0.968-1.144 |       |

|              |                        |       |             |       |
|--------------|------------------------|-------|-------------|-------|
|              | vanGils <i>et al.</i>  | 1.057 | 0.973-1.147 |       |
|              | Xu <i>et al.</i>       | 1.046 | 0.963-1.136 |       |
|              | Ritchey <i>et al.</i>  | 1.044 | 0.961-1.133 |       |
|              | Hirata <i>et al.</i> . | 1.049 | 0.966-1.139 |       |
|              | Dhillon <i>et al.</i>  | 1.056 | 0.973-1.147 |       |
|              | Kuasne <i>et al.</i>   | 1.049 | 0.965-1.139 |       |
|              | Zhu <i>et al.</i>      | 1.031 | 0.948-1.121 |       |
|              | Chen <i>et al.</i>     | 1.053 | 0.970-1.143 |       |
|              | Chen <i>et al.</i>     | 1.045 | 0.962-1.135 |       |
|              | Rybicki <i>et al.</i>  | 1.058 | 0.973-1.150 |       |
|              | Rybicki <i>et al.</i>  | 1.057 | 0.972-1.149 |       |
|              | Agalliu <i>et al.</i>  | 1.077 | 0.988-1.175 |       |
|              | Agalliu <i>et al.</i>  | 1.052 | 0.970-1.142 |       |
|              | Hirata <i>et al.</i> . | 1.043 | 0.961-1.133 |       |
| BB vs. AA+AB | Figuroa <i>et al.</i>  | 1.030 | 0.951-1.115 | Fixed |
|              | Matullo <i>et al.</i>  | 1.043 | 0.966-1.125 |       |
|              | Stern <i>et al.</i>    | 1.039 | 0.963-1.121 |       |
|              | Stern <i>et al.</i>    | 1.045 | 0.968-1.129 |       |
|              | Mittal <i>et al.</i>   | 1.035 | 0.958-1.118 |       |
|              | Arizono <i>et al.</i>  | 1.048 | 0.971-1.132 |       |
|              | Mittal <i>et al.</i>   | 1.040 | 0.963-1.123 |       |
|              | Sak <i>et al.</i>      | 1.046 | 0.967-1.130 |       |
|              | Sanyal <i>et al.</i>   | 1.038 | 0.961-1.121 |       |
|              | Matullo <i>et al.</i>  | 1.046 | 0.968-1.130 |       |
|              | Fontana <i>et al.</i>  | 1.043 | 0.967-1.126 |       |
|              | Broberg <i>et al.</i>  | 1.041 | 0.964-1.123 |       |
|              | Matullo <i>et al.</i>  | 1.036 | 0.960-1.119 |       |

|                 |         |                        |       |             |        |
|-----------------|---------|------------------------|-------|-------------|--------|
|                 |         | Shen <i>et al.</i>     | 1.041 | 0.964-1.124 |        |
|                 |         | Ramaniuk <i>et al.</i> | 1.046 | 0.968-1.130 |        |
|                 |         | Zhi <i>et al.</i>      | 1.031 | 0.955-1.114 |        |
|                 |         | Wang <i>et al.</i>     | 1.041 | 0.964-1.124 |        |
|                 |         | Andrew <i>et al.</i>   | 1.067 | 0.984-1.156 |        |
|                 |         | Kelsey <i>et al.</i>   | 1.061 | 0.982-1.146 |        |
|                 |         | Huang <i>et al.</i>    | 1.038 | 0.960-1.122 |        |
|                 |         | Gao <i>et al.</i>      | 1.031 | 0.955-1.114 |        |
|                 |         | Hamano <i>et al.</i>   | 1.038 | 0.961-1.121 |        |
|                 |         | Berhane <i>et al.</i>  | 1.027 | 0.951-1.109 |        |
|                 |         | Mittal. <i>et al.</i>  | 1.026 | 0.950-1.109 |        |
|                 |         | Abe <i>et al.</i>      | 1.038 | 0.960-1.122 |        |
|                 |         | vanGils <i>et al.</i>  | 1.042 | 0.965-1.125 |        |
|                 |         | Xu <i>et al.</i>       | 1.035 | 0.959-1.117 |        |
|                 |         | Ritchey <i>et al.</i>  | 1.031 | 0.955-1.113 |        |
|                 |         | Hirata <i>et al.</i> . | 1.036 | 0.959-1.118 |        |
|                 |         | Dhillon <i>et al.</i>  | 1.041 | 0.964-1.124 |        |
|                 |         | Kuasne <i>et al.</i>   | 1.030 | 0.954-1.112 |        |
|                 |         | Zhu <i>et al.</i>      | 1.021 | 0.944-1.103 |        |
|                 |         | Chen <i>et al.</i>     | 1.039 | 0.963-1.122 |        |
|                 |         | Chen <i>et al.</i>     | 1.035 | 0.958-1.117 |        |
|                 |         | Rybicki <i>et al.</i>  | 1.042 | 0.964-1.126 |        |
|                 |         | Rybicki <i>et al.</i>  | 1.043 | 0.965-1.127 |        |
|                 |         | Agalliu <i>et al.</i>  | 1.055 | 0.973-1.143 |        |
|                 |         | Agalliu <i>et al.</i>  | 1.039 | 0.963-1.121 |        |
|                 |         | Hirata <i>et al.</i> . | 1.030 | 0.954-1.112 |        |
| XRCC1-rs1799782 | B vs. A | Huang <i>et al.</i>    | 1.048 | 0.927-1.185 | Random |

|           |                       |       |              |        |
|-----------|-----------------------|-------|--------------|--------|
|           | Andrew <i>et al.</i>  | 1.056 | 0.935-1.194  |        |
|           | Figuroa <i>et al.</i> | 1.040 | 0.917-1.178  |        |
|           | Matullo <i>et al.</i> | 1.045 | 0.927-1.178  |        |
|           | Stern <i>et al.</i>   | 1.047 | 0.935-1.174  |        |
|           | Stern <i>et al.</i>   | 1.062 | 0.948- 1.189 |        |
|           | Mittal <i>et al.</i>  | 1.033 | 0.917-1.163  |        |
|           | Mittal <i>et al.</i>  | 1.038 | 0.920-1.172  |        |
|           | Fontana <i>et al.</i> | 1.040 | 0.925-1.170  |        |
|           | Wang <i>et al.</i>    | 1.016 | 0.908-1.136  |        |
|           | Sak <i>et al.</i>     | 1.047 | 0.927-1.183  |        |
|           | Matullo <i>et al.</i> | 1.059 | 0.943-1.191  |        |
|           | Agalliu <i>et al.</i> | 1.045 | 0.928-1.176  |        |
|           | Hamano <i>et al.</i>  | 1.022 | 0.912-1.144  |        |
|           | Hirata <i>et al.</i>  | 1.029 | 0.912-1.160  |        |
|           | Zhu <i>et al.</i>     | 1.020 | 0.907-1.148  |        |
|           | vanGils <i>et al.</i> | 1.050 | 0.934-1.180  |        |
|           | Xu <i>et al.</i>      | 1.071 | 0.956-1.199  |        |
|           | Agalliu <i>et al.</i> | 1.059 | 0.938-1.196  |        |
|           | Mittal <i>et al.</i>  | 1.035 | 0.918-1.168  |        |
| BA vs. AA | Huang <i>et al.</i>   | 0.989 | 0.869-1.126  | Random |
|           | Andrew <i>et al.</i>  | 0.994 | 0.872-1.134  |        |
|           | Figuroa <i>et al.</i> | 0.985 | 0.863-1.124  |        |
|           | Matullo <i>et al.</i> | 0.987 | 0.870-1.119  |        |
|           | Stern <i>et al.</i>   | 0.984 | 0.880-1.116  |        |
|           | Stern <i>et al.</i>   | 1.004 | 0.892-1.131  |        |
|           | Mittal <i>et al.</i>  | 0.978 | 0.864-1.107  |        |
|           | Mittal <i>et al.</i>  | 0.983 | 0.866-1.115  |        |

|              |                        |       |             |        |
|--------------|------------------------|-------|-------------|--------|
|              | Fontana <i>et al.</i>  | 0.987 | 0.875-1.114 |        |
|              | Wang <i>et al.</i>     | 0.969 | 0.857-1.095 |        |
|              | Sak <i>et al.</i>      | 0.989 | 0.870-1.125 |        |
|              | Matullo <i>et al.</i>  | 1.002 | 0.886-1.134 |        |
|              | Agalliu <i>et al.</i>  | 0.989 | 0.873-1.119 |        |
|              | Hamano <i>et al.</i>   | 0.961 | 0.869-1.062 |        |
|              | Hirata <i>et al.</i>   | 0.969 | 0.859-1.092 |        |
|              | Zhu <i>et al.</i>      | 0.974 | 0.855-1.109 |        |
|              | vanGils <i>et al.</i>  | 0.993 | 0.878-1.124 |        |
|              | Xu <i>et al.</i>       | 1.013 | 0.903-1.137 |        |
|              | Agalliu <i>et al.</i>  | 0.999 | 0.876-1.139 |        |
|              | Mittal <i>et al.</i>   | 0.993 | 0.875-1.126 |        |
| BA+BB vs. AA | Huang <i>et al.</i>    | 1.021 | 0.890-1.171 | Random |
|              | Andrew <i>et al.</i>   | 1.027 | 0.894-1.180 |        |
|              | Figueroa <i>et al.</i> | 1.014 | 0.882-1.167 |        |
|              | Matullo <i>et al.</i>  | 1.018 | 0.891-1.164 |        |
|              | Stern <i>et al.</i>    | 1.022 | 0.900-1.160 |        |
|              | Stern <i>et al.</i>    | 1.037 | 0.914-1.177 |        |
|              | Mittal <i>et al.</i>   | 1.006 | 0.882-1.148 |        |
|              | Mittal <i>et al.</i>   | 1.012 | 0.885-1.158 |        |
|              | Fontana <i>et al.</i>  | 1.017 | 0.895-1.156 |        |
|              | Wang <i>et al.</i>     | 0.992 | 0.873-1.127 |        |
|              | Sak <i>et al.</i>      | 1.020 | 0.890-1.169 |        |
|              | Matullo <i>et al.</i>  | 1.034 | 0.907-1.179 |        |
|              | Agalliu <i>et al.</i>  | 1.019 | 0.893-1.162 |        |
|              | Hamano <i>et al.</i>   | 0.989 | 0.880-1.111 |        |
|              | Hirata <i>et al.</i>   | 0.998 | 0.876-1.136 |        |

|              |  |                        |       |              |       |
|--------------|--|------------------------|-------|--------------|-------|
|              |  | Zhu <i>et al.</i>      | 0.997 | 0.872-1.141  |       |
|              |  | vanGils <i>et al.</i>  | 1.024 | 0.899-1.167  |       |
|              |  | Xu <i>et al.</i>       | 1.047 | 0.926-1.185  |       |
|              |  | Agalliu <i>et al.</i>  | 1.031 | 0.898-1.183  |       |
|              |  | Mittal <i>et al.</i>   | 1.015 | 0.887-1.162  |       |
| BB vs. AA    |  | Huang <i>et al.</i>    | 1.537 | 1.195-1.976  | Fixed |
|              |  | Andrew <i>et al.</i>   | 1.603 | 1.237-2.076  |       |
|              |  | Figueroa <i>et al.</i> | 1.493 | 1.160-1.920  |       |
|              |  | Matullo <i>et al.</i>  | 1.524 | 1.187-1.958  |       |
|              |  | Stern <i>et al.</i>    | 1.525 | 1.188-1.958  |       |
|              |  | Stern <i>et al.</i>    | 1.525 | 1.188-1.958  |       |
|              |  | Mittal <i>et al.</i>   | 1.514 | 1.178-1.946  |       |
|              |  | Mittal <i>et al.</i>   | 1.520 | 1.182-1.956  |       |
|              |  | Fontana <i>et al.</i>  | 1.525 | 1.188-1.958  |       |
|              |  | Wang <i>et al.</i>     | 1.392 | 1.069-1.813  |       |
|              |  | Sak <i>et al.</i>      | 1.540 | 1.196-1.982  |       |
|              |  | Matullo <i>et al.</i>  | 1.525 | 1.188-1.958  |       |
|              |  | Agalliu <i>et al.</i>  | 1.525 | 1.188-1.958  |       |
|              |  | Hamano <i>et al.</i>   | 1.533 | 1.185-1.985  |       |
|              |  | Hirata <i>et al.</i>   | 1.541 | 1.180-2.013  |       |
|              |  | Zhu <i>et al.</i>      | 1.359 | 1.180-2.013  |       |
|              |  | vanGils <i>et al.</i>  | 1.525 | 1.188-1.958  |       |
|              |  | Xu <i>et al.</i>       | 1.762 | 1.341-2.316  |       |
|              |  | Agalliu <i>et al.</i>  | 1.571 | 1.216-2.028  |       |
|              |  | Mittal <i>et al.</i>   | 1.477 | 1.144--1.908 |       |
| BB vs. AA+AB |  | Huang <i>et al.</i>    | 1.483 | 1.164-1.890  | Fixed |
|              |  | Andrew <i>et al.</i>   | 1.539 | 1.200-1.973  |       |

|                 |              |                               |       |              |       |
|-----------------|--------------|-------------------------------|-------|--------------|-------|
|                 |              | Figuroa <i>et al.</i>         | 1.444 | 1.133-1.842  |       |
|                 |              | Matullo <i>et al.</i>         | 1.473 | 1.157-1.875  |       |
|                 |              | Stern <i>et al.</i>           | 1.474 | 1.159-1.875  |       |
|                 |              | Stern <i>et al.</i>           | 1.474 | 1.159-1.875  |       |
|                 |              | Mittal <i>et al.</i>          | 1.465 | 1.150-1.865  |       |
|                 |              | Mittal <i>et al.</i>          | 1.469 | 1.153-1.873  |       |
|                 |              | Fontana <i>et al.</i>         | 1.474 | 1.155-1.882  |       |
|                 |              | Wang <i>et al.</i>            | 1.362 | 1.057-1.755  |       |
|                 |              | Sak <i>et al.</i>             | 1.486 | 1.165-1.895  |       |
|                 |              | Matullo <i>et al.</i>         | 1.474 | 1.159-1.875  |       |
|                 |              | Agalliu <i>et al.</i>         | 1.474 | 1.159-1.875  |       |
|                 |              | Hamano <i>et al.</i>          | 1.508 | 1.176-1.933  |       |
|                 |              | Hirata <i>et al.</i>          | 1.521 | 1.176-1.968  |       |
|                 |              | Zhu <i>et al.</i>             | 1.326 | 1.000-1.757  |       |
|                 |              | vanGils <i>et al.</i>         | 1.474 | 1.159-1.875  |       |
|                 |              | Xu <i>et al.</i>              | 1.627 | 1.251-2.117  |       |
|                 |              | Agalliu <i>et al.</i>         | 1.512 | 1.182-1.933  |       |
|                 |              | Mittal <i>et al.</i>          | 1.427 | 1.116-1.825  |       |
| XRCC2-rs3218536 | B vs. A      | Nowacka-Zawisza <i>et al.</i> | 0.930 | 0.772-1.120  | Fixed |
|                 |              | Matullo <i>et al.</i>         | 0.939 | 0.778-1.133  |       |
|                 |              | Figuroa <i>et al.</i>         | 1.064 | 0.649-1.744  |       |
|                 | BA vs. AA    | Nowacka-Zawisza <i>et al.</i> | 0.997 | 0.813-1.224  | Fixed |
|                 |              | Matullo <i>et al.</i>         | 0.996 | 0.811-1.223  |       |
|                 |              | Figuroa <i>et al.</i>         | 1.196 | 0.701-2.041  |       |
|                 | BA+BB vs. AA | Nowacka-Zawisza <i>et al.</i> | 0.961 | 0.787-1.175  | Fixed |
|                 |              | Matullo <i>et al.</i>         | 0.966 | 0.789-1.182  |       |
|                 |              | Figuroa <i>et al.</i>         | 1.132 | 0.672-10.909 |       |

|                               |              |                               |       |             |        |
|-------------------------------|--------------|-------------------------------|-------|-------------|--------|
| XRCC3-rs861539                | BB vs. AA    | Nowacka-Zawisza <i>et al.</i> | 0.438 | 0.177-1.080 | Fixed  |
|                               |              | Matullo <i>et al.</i>         | 0.453 | 0.171-1.198 |        |
|                               |              | Figueroa <i>et al.</i>        | 0.353 | 0.031-3.954 |        |
|                               | BB vs. AA+AB | Nowacka-Zawisza <i>et al.</i> | 0.438 | 0.177-1.079 | Fixed  |
|                               |              | Matullo <i>et al.</i>         | 0.455 | 0.172-1.201 |        |
|                               |              | Figueroa <i>et al.</i>        | 0.345 | 0.030-3.854 |        |
|                               | B vs. A      | Narter <i>et al.</i>          | 1.043 | 0.945-1.151 | Random |
|                               |              | Fontana <i>et al.</i>         | 1.018 | 0.910-1.140 |        |
|                               |              | Matullo <i>et al.</i>         | 0.990 | 0.885-1.106 |        |
|                               |              | Zhu <i>et al.</i>             | 0.997 | 0.889-1.118 |        |
|                               |              | Andrew <i>et al.</i>          | 1.000 | 0.882-1.133 |        |
|                               |              | Gangwar <i>et al.</i>         | 1.008 | 0.897-1.133 |        |
|                               |              | Figueroa <i>et al.</i>        | 0.998 | 0.881-1.130 |        |
|                               |              | Mittle <i>et al.</i>          | 1.009 | 0.898-1.133 |        |
|                               |              | Matullo <i>et al.</i>         | 0.996 | 0.886-1.120 |        |
|                               |              | Sanyal. <i>et al.</i>         | 1.000 | 0.889-1.125 |        |
|                               |              | Shen <i>et al.</i>            | 1.023 | 0.913-1.146 |        |
|                               |              | Narter <i>et al.</i>          | 1.043 | 0.945-1.151 |        |
|                               |              | Wu <i>et al.</i>              | 0.999 | 0.885-1.127 |        |
|                               |              | Broberg <i>et al.</i>         | 1.011 | 0.902-1.134 |        |
|                               |              | Stern <i>et al.</i>           | 0.997 | 0.888-1.120 |        |
| Matullo <i>et al.</i>         | 1.012        | 0.901-1.137                   |       |             |        |
| Hao <i>et al.</i>             | 0.993        | 0.888-1.111                   |       |             |        |
| Nowacka-Zawisza <i>et al.</i> | 1.023        | 0.914-1.146                   |       |             |        |
| Ritchey <i>et al.</i>         | 1.007        | 0.898-1.130                   |       |             |        |
| Dhillon <i>et al.</i>         | 1.013        | 0.903-1.137                   |       |             |        |
| Mandal. <i>et al.</i>         | 0.995        | 0.887-1.117                   |       |             |        |



|              |                               |       |             |        |
|--------------|-------------------------------|-------|-------------|--------|
|              | Hamano <i>et al.</i>          | 1.013 | 0.904-1.135 |        |
|              | Dhillon <i>et al.</i>         | 1.013 | 0.903-1.137 |        |
| BA vs. AA    | Narter <i>et al.</i>          | 1.034 | 0.909-1.176 | Random |
|              | Fontana <i>et al.</i>         | 1.036 | 0.911-1.178 |        |
|              | Matullo <i>et al.</i>         | 1.005 | 0.897-1.126 |        |
|              | Zhu <i>et al.</i>             | 1.034 | 0.906-1.181 |        |
|              | Andrew <i>et al.</i>          | 1.039 | 0.904-1.194 |        |
|              | Gangwar <i>et al.</i>         | 1.032 | 0.903-1.180 |        |
|              | Figueroa <i>et al.</i>        | 1.022 | 0.889-1.175 |        |
|              | Mittle <i>et al.</i>          | 1.033 | 0.904-1.181 |        |
|              | Matullo <i>et al.</i>         | 1.019 | 0.892-1.165 |        |
|              | Sanyal. <i>et al.</i>         | 1.035 | 0.905-1.183 |        |
|              | Shen <i>et al.</i>            | 1.061 | 0.938-1.199 |        |
|              | Narter <i>et al.</i>          | 1.034 | 0.909-1.176 |        |
|              | Wu <i>et al.</i>              | 1.018 | 0.889-1.166 |        |
|              | Broberg <i>et al.</i>         | 1.026 | 0.900-1.170 |        |
|              | Stern <i>et al.</i>           | 1.020 | 0.893-1.164 |        |
|              | Matullo <i>et al.</i>         | 1.036 | 0.907-1.184 |        |
|              | Hao <i>et al.</i>             | 1.012 | 0.892-1.148 |        |
|              | Nowacka-Zawisza <i>et al.</i> | 1.032 | 0.904-1.178 |        |
|              | Ritchey <i>et al.</i>         | 1.037 | 0.910-1.182 |        |
|              | Dhillon <i>et al.</i>         | 1.056 | 0.934-1.195 |        |
|              | Mandal. <i>et al.</i>         | 1.018 | 0.892-1.161 |        |
|              | Hamano <i>et al.</i>          | 1.041 | 0.914-1.185 |        |
|              | Dhillon <i>et al.</i>         | 1.056 | 0.934-1.195 |        |
| BA+BB vs. AA | Narter <i>et al.</i>          | 1.044 | 0.918-1.187 | Random |
|              | Fontana <i>et al.</i>         | 1.026 | 0.894-1.177 |        |

|           |                               |       |             |        |
|-----------|-------------------------------|-------|-------------|--------|
|           | Matullo <i>et al.</i>         | 0.993 | 0.873-1.129 |        |
|           | Zhu <i>et al.</i>             | 1.012 | 0.878-1.166 |        |
|           | Andrew <i>et al.</i>          | 1.016 | 0.873-1.182 |        |
|           | Gangwar <i>et al.</i>         | 1.019 | 0.883-1.175 |        |
|           | Figueroa <i>et al.</i>        | 1.006 | 0.866-1.169 |        |
|           | Mittle <i>et al.</i>          | 1.019 | 0.883-1.176 |        |
|           | Matullo <i>et al.</i>         | 1.004 | 0.871-1.158 |        |
|           | Sanyal. <i>et al.</i>         | 1.015 | 0.879-1.172 |        |
|           | Shen <i>et al.</i>            | 1.047 | 0.915-1.198 |        |
|           | Narter <i>et al.</i>          | 1.044 | 0.918-1.187 |        |
|           | Wu <i>et al.</i>              | 1.005 | 0.868-1.163 |        |
|           | Broberg <i>et al.</i>         | 1.016 | 0.883-1.170 |        |
|           | Stern <i>et al.</i>           | 1.005 | 0.872-1.158 |        |
|           | Matullo <i>et al.</i>         | 1.023 | 0.888-1.180 |        |
|           | Hao <i>et al.</i>             | 0.999 | 0.871-1.146 |        |
|           | Nowacka-Zawisza <i>et al.</i> | 1.028 | 0.893-1.183 |        |
|           | Ritchey <i>et al.</i>         | 1.021 | 0.887-1.175 |        |
|           | Dhillon <i>et al.</i>         | 1.039 | 0.905-1.191 |        |
|           | Mandal. <i>et al.</i>         | 1.003 | 0.871-1.155 |        |
|           | Hamano <i>et al.</i>          | 1.027 | 0.894-1.181 |        |
|           | Dhillon <i>et al.</i>         | 1.039 | 0.905-1.191 |        |
| BB vs. AA | Narter <i>et al.</i>          | 1.141 | 0.954-1.365 | Random |
|           | Fontana <i>et al.</i>         | 1.103 | 0.901-1.350 |        |
|           | Matullo <i>et al.</i>         | 1.051 | 0.857-1.290 |        |
|           | Zhu <i>et al.</i>             | 1.053 | 0.863-1.286 |        |
|           | Andrew <i>et al.</i>          | 1.067 | 0.848-1.342 |        |
|           | Gangwar <i>et al.</i>         | 1.086 | 0.881-1.339 |        |

|              |                               |       |             |        |
|--------------|-------------------------------|-------|-------------|--------|
|              | Figueroa <i>et al.</i>        | 1.068 | 0.850-1.342 |        |
|              | Mittle <i>et al.</i>          | 1.087 | 0.882-1.340 |        |
|              | Matullo <i>et al.</i>         | 1.058 | 0.853-1.311 |        |
|              | Sanyal. <i>et al.</i>         | 1.062 | 0.858-1.316 |        |
|              | Shen <i>et al.</i>            | 1.107 | 0.899-1.364 |        |
|              | Narter <i>et al.</i>          | 1.141 | 0.954-1.365 |        |
|              | Wu <i>et al.</i>              | 1.071 | 0.857-1.337 |        |
|              | Broberg <i>et al.</i>         | 1.099 | 0.895-1.350 |        |
|              | Stern <i>et al.</i>           | 1.063 | 0.860-1.314 |        |
|              | Matullo <i>et al.</i>         | 1.098 | 0.889-1.357 |        |
|              | Hao <i>et al.</i>             | 1.077 | 0.877-1.322 |        |
|              | Nowacka-Zawisza <i>et al.</i> | 1.124 | 0.920-1.375 |        |
|              | Ritchey <i>et al.</i>         | 1.073 | 0.874-1.317 |        |
|              | Dhillon <i>et al.</i>         | 1.066 | 0.867-1.312 |        |
|              | Mandal. <i>et al.</i>         | 1.063 | 0.864-1.308 |        |
|              | Hamano <i>et al.</i>          | 1.081 | 0.879-1.328 |        |
|              | Dhillon <i>et al.</i>         | 1.066 | 0.867-1.312 |        |
| BB vs. AA+AB | Narter <i>et al.</i>          | 1.103 | 0.936-1.300 | Random |
|              | Fontana <i>et al.</i>         | 1.071 | 0.886-1.295 |        |
|              | Matullo <i>et al.</i>         | 1.044 | 0.859-1.268 |        |
|              | Zhu <i>et al.</i>             | 1.024 | 0.853-1.230 |        |
|              | Andrew <i>et al.</i>          | 1.032 | 0.837-1.272 |        |
|              | Gangwar <i>et al.</i>         | 1.053 | 0.868-1.278 |        |
|              | Figueroa <i>et al.</i>        | 1.043 | 0.844-1.288 |        |
|              | Mittle <i>et al.</i>          | 1.054 | 0.869-1.278 |        |
|              | Matullo <i>et al.</i>         | 1.034 | 0.847-1.264 |        |
|              | Sanyal. <i>et al.</i>         | 1.029 | 0.846-1.252 |        |

|                 |              |                               |       |             |       |
|-----------------|--------------|-------------------------------|-------|-------------|-------|
|                 |              | Shen <i>et al.</i>            | 1.054 | 0.866-1.283 |       |
|                 |              | Narter <i>et al.</i>          | 1.103 | 0.936-1.300 |       |
|                 |              | Wu <i>et al.</i>              | 1.047 | 0.853-1.286 |       |
|                 |              | Broberg <i>et al.</i>         | 1.069 | 0.885-1.291 |       |
|                 |              | Stern <i>et al.</i>           | 1.038 | 0.853-1.264 |       |
|                 |              | Matullo <i>et al.</i>         | 1.062 | 0.873-1.292 |       |
|                 |              | Hao <i>et al.</i>             | 1.047 | 0.866-1.265 |       |
|                 |              | Nowacka-Zawisza <i>et al.</i> | 1.087 | 0.903-1.309 |       |
|                 |              | Ritchev <i>et al.</i>         | 1.042 | 0.863-1.259 |       |
|                 |              | Dhillon <i>et al.</i>         | 1.029 | 0.853-1.241 |       |
|                 |              | Mandal. <i>et al.</i>         | 1.036 | 0.855-1.255 |       |
|                 |              | Hamano <i>et al.</i>          | 1.049 | 0.867-1.268 |       |
|                 |              | Dhillon <i>et al.</i>         | 1.029 | 0.853-1.241 |       |
| XRCC3-rs1799796 | B vs. A      | Matullo <i>et al.</i>         | 0.979 | 0.862-1.113 | Fixed |
|                 |              | Mittle <i>et al.</i>          | 0.941 | 0.833-1.063 |       |
|                 |              | Wu <i>et al.</i>              | 1.059 | 0.908-1.234 |       |
|                 |              | Broberg <i>et al.</i>         | 0.997 | 0.886-1.121 |       |
|                 |              | Matullo <i>et al.</i>         | 0.939 | 0.830-1.064 |       |
|                 | BA vs. AA    | Matullo <i>et al.</i>         | 1.007 | 0.845-1.200 | Fixed |
|                 |              | Mittle <i>et al.</i>          | 0.917 | 0.775-1.086 |       |
|                 |              | Wu <i>et al.</i>              | 1.039 | 0.849-1.272 |       |
|                 |              | Broberg <i>et al.</i>         | 0.986 | 0.841-1.157 |       |
|                 |              | Matullo <i>et al.</i>         | 0.985 | 0.832-1.165 |       |
|                 | BA+BB vs. AA | Matullo <i>et al.</i>         | 0.995 | 0.842-1.175 | Fixed |
|                 |              | Mittle <i>et al.</i>          | 0.920 | 0.784-1.079 |       |
|                 |              | Wu <i>et al.</i>              | 1.059 | 0.873-1.285 |       |
|                 |              | Broberg <i>et al.</i>         | 0.991 | 0.852-1.154 |       |

|                       |                       |                       |             |             |        |
|-----------------------|-----------------------|-----------------------|-------------|-------------|--------|
| XRCC4-rs6869366       | BB vs. AA             | Matullo <i>et al.</i> | 0.958       | 0.816-1.125 | Random |
|                       |                       | Matullo <i>et al.</i> | 0.934       | 0.515-1.692 |        |
|                       |                       | Mittle <i>et al.</i>  | 0.949       | 0.564-1.595 |        |
|                       |                       | Wu <i>et al.</i>      | 1.077       | 0.608-1.910 |        |
|                       |                       | Broberg <i>et al.</i> | 1.075       | 0.715-1.614 |        |
|                       | BB vs. AA+AB          | Matullo <i>et al.</i> | 0.811       | 0.598-1.100 | Random |
|                       |                       | Matullo <i>et al.</i> | 0.940       | 0.528-1.673 |        |
|                       |                       | Mittle <i>et al.</i>  | 0.983       | 0.591-1.633 |        |
|                       |                       | Wu <i>et al.</i>      | 1.070       | 0.602-1.904 |        |
|                       |                       | Broberg <i>et al.</i> | 1.096       | 0.739-1.625 |        |
|                       | B vs. A               | Matullo <i>et al.</i> | 0.836       | 0.625-1.120 | Fixed  |
|                       |                       | Chang <i>et al.</i>   | 0.853       | 0.701-1.038 |        |
|                       |                       | Mandal. <i>et al.</i> | 1.085       | 0.857-1.374 |        |
|                       |                       | Mittal. <i>et al.</i> | 1.038       | 0.812-1.327 |        |
|                       |                       | Chang <i>et al.</i>   | 0.794       | 0.645-0.979 |        |
|                       | BA vs. AA             | Chang <i>et al.</i>   | 0.936       | 0.736-1.190 | Fixed  |
|                       |                       | Mandal. <i>et al.</i> | 1.260       | 0.951-1.670 |        |
|                       |                       | Mittal. <i>et al.</i> | 1.196       | 0.897-1.595 |        |
|                       |                       | Chang <i>et al.</i>   | 0.856       | 0.661-1.109 |        |
|                       | BA+BB vs. AA          | Chang <i>et al.</i>   | 0.884       | 0.699-1.118 | Fixed  |
| Mandal. <i>et al.</i> |                       | 1.200                 | 0.911-1.582 |             |        |
| Mittal. <i>et al.</i> |                       | 1.137                 | 0.857-1.508 |             |        |
| BB vs. AA             | Chang <i>et al.</i>   | 0.806                 | 0.626-1.037 | Fixed       |        |
|                       | Chang <i>et al.</i>   | 0.413                 | 0.210-0.809 |             |        |
|                       | Mandal. <i>et al.</i> | 0.474                 | 0.197-1.141 |             |        |
|                       | Mittal. <i>et al.</i> | 0.341                 | 0.119-0.980 |             |        |
|                       |                       | Chang <i>et al.</i>   | 0.413       | 0.210-0.809 |        |

|                     |                       |                        |             |             |        |
|---------------------|-----------------------|------------------------|-------------|-------------|--------|
| XRCC4-rs28360071    | BB vs. AA+AB          | Chang <i>et al.</i>    | 0.469       | 0.242-0.910 | Fixed  |
|                     |                       | Mandal. <i>et al.</i>  | 0.526       | 0.222-1.245 |        |
|                     |                       | Mittal. <i>et al.</i>  | 0.401       | 0.141-1.134 |        |
|                     |                       | Chang <i>et al.</i>    | 0.469       | 0.242-0.910 |        |
|                     | B vs. A               | Mandal. <i>et al.</i>  | 1.188       | 0.909-1.553 | Fixed  |
|                     |                       | Mittal. <i>et al.</i>  | 1.382       | 1.064-1.795 |        |
|                     |                       | Chang <i>et al.</i>    | 1.544       | 1.195-1.997 |        |
|                     | BA vs. AA             | Mandal. <i>et al.</i>  | 1.129       | 0.818-1.558 | Fixed  |
|                     |                       | Mittal. <i>et al.</i>  | 1.234       | 0.892-1.708 |        |
|                     |                       | Chang <i>et al.</i>    | 1.261       | 0.913-1.741 |        |
|                     | BA+BB vs. AA          | Mandal. <i>et al.</i>  | 1.179       | 0.865-1.608 | Fixed  |
|                     |                       | Mittal. <i>et al.</i>  | 1.353       | 0.994-1.841 |        |
| Chang <i>et al.</i> |                       | 1.447                  | 1.073-1.952 |             |        |
| BB vs. AA           | Mandal. <i>et al.</i> | 1.690                  | 0.712-4.010 | Fixed       |        |
|                     | Mittal. <i>et al.</i> | 2.417                  | 1.141-5.116 |             |        |
|                     | Chang <i>et al.</i>   | 2.781                  | 1.445-5.351 |             |        |
| XRCC4-rs1805377     | BB vs. AA+AB          | Mandal. <i>et al.</i>  | 1.635       | 0.692-3.863 | Fixed  |
|                     |                       | Mittal. <i>et al.</i>  | 2.255       | 1.071-4.747 |        |
|                     |                       | Chang <i>et al.</i>    | 2.618       | 1.367-5.014 |        |
|                     | B vs. A               | Mandal. <i>et al.</i>  | 0.815       | 0.707-0.940 | Random |
|                     |                       | Luedeke <i>et al.</i>  | 0.808       | 0.695-0.939 |        |
|                     |                       | Broberg <i>et al.</i>  | 0.820       | 0.717-0.938 |        |
|                     |                       | Mittal. <i>et al.</i>  | 0.826       | 0.716-0.954 |        |
|                     |                       | Figueroa <i>et al.</i> | 0.884       | 0.740-1.056 |        |
|                     | BA vs. AA             | Mandal. <i>et al.</i>  | 1.033       | 0.757-1.411 | Random |
|                     |                       | Luedeke <i>et al.</i>  | 0.997       | 0.768-1.293 |        |
|                     |                       | Broberg <i>et al.</i>  | 1.018       | 0.781-1.325 |        |

|                 |                        |                        |             |             |        |
|-----------------|------------------------|------------------------|-------------|-------------|--------|
| XRCC7-rs7003908 | BA+BB vs. AA           | Mittal. <i>et al.</i>  | 1.023       | 0.737-1.420 | Random |
|                 |                        | Figueroa <i>et al.</i> | 0.983       | 0.754-1.282 |        |
|                 |                        | Mandal. <i>et al.</i>  | 0.934       | 0.689-1.266 |        |
|                 |                        | Luedeke <i>et al.</i>  | 0.923       | 0.717-1.188 |        |
|                 |                        | Broberg <i>et al.</i>  | 0.926       | 0.717-1.197 |        |
|                 | BB vs. AA              | Mittal. <i>et al.</i>  | 0.952       | 0.694-1.306 | Fixed  |
|                 |                        | Figueroa <i>et al.</i> | 0.926       | 0.716-1.198 |        |
|                 |                        | Mandal. <i>et al.</i>  | 0.750       | 0.432-1.304 |        |
|                 |                        | Luedeke <i>et al.</i>  | 0.660       | 0.375-1.160 |        |
|                 |                        | Broberg <i>et al.</i>  | 0.709       | 0.432-1.165 |        |
|                 | BB vs. AA+AB           | Mittal. <i>et al.</i>  | 0.902       | 0.536-1.516 | Fixed  |
|                 |                        | Figueroa <i>et al.</i> | 0.645       | 0.345-1.204 |        |
|                 |                        | Mandal. <i>et al.</i>  | 0.755       | 0.635-0.898 |        |
|                 |                        | Luedeke <i>et al.</i>  | 0.705       | 0.572-0.867 |        |
|                 |                        | Broberg <i>et al.</i>  | 0.750       | 0.632-0.890 |        |
|                 | B vs. A                | Mittal. <i>et al.</i>  | 0.770       | 0.648-0.915 | Random |
|                 |                        | Figueroa <i>et al.</i> | 0.804       | 0.606-1.066 |        |
|                 |                        | Hirata <i>et al.</i> . | 1.122       | 0.670-1.876 |        |
|                 |                        | Mandal. <i>et al.</i>  | 1.066       | 0.638-1.781 |        |
|                 |                        | Wang <i>et al.</i>     | 1.257       | 0.791-1.997 |        |
| BA vs. AA       | Gangwar <i>et al.</i>  | 0.973                  | 0.682-1.388 | Random      |        |
|                 | Zhi <i>et al.</i>      | 1.273                  | 0.831-1.950 |             |        |
|                 | Hirata <i>et al.</i> . | 1.136                  | 0.683-1.887 |             |        |
|                 | Hirata <i>et al.</i> . | 0.935                  | 0.654-1.335 |             |        |
|                 | Mandal. <i>et al.</i>  | 0.960                  | 0.658-1.398 |             |        |
|                 |                        | 1.074                  | 0.735-1.569 |             |        |
|                 |                        | 0.893                  | 0.661-1.206 |             |        |

|              |                        |       |             |        |
|--------------|------------------------|-------|-------------|--------|
|              | Zhi <i>et al.</i>      | 1.101 | 0.790-1.533 |        |
|              | Hirata <i>et al.</i> . | 1.033 | 0.703-1.517 |        |
| BA+BB vs. AA | Hirata <i>et al.</i> . | 1.075 | 0.630-1.834 | Random |
|              | Mandal. <i>et al.</i>  | 1.048 | 0.624-1.762 |        |
|              | Wang <i>et al.</i>     | 1.241 | 0.742-2.078 |        |
|              | Gangwar <i>et al.</i>  | 0.934 | 0.643-1.359 |        |
|              | Zhi <i>et al.</i>      | 1.267 | 0.794-2.021 |        |
|              | Hirata <i>et al.</i> . | 1.146 | 0.668-1.966 |        |
| BB vs. AA    | Hirata <i>et al.</i> . | 1.190 | 0.443-3.191 | Random |
|              | Mandal. <i>et al.</i>  | 1.028 | 0.346-3.050 |        |
|              | Wang <i>et al.</i>     | 1.546 | 0.680-3.517 |        |
|              | Gangwar <i>et al.</i>  | 0.900 | 0.402-2.014 |        |
|              | Zhi <i>et al.</i>      | 1.540 | 0.707-3.355 |        |
|              | Hirata <i>et al.</i> . | 1.102 | 0.402-3.019 |        |
| BB vs. AA+AB | Hirata <i>et al.</i> . | 1.206 | 0.560-2.600 | Random |
|              | Mandal. <i>et al.</i>  | 1.021 | 0.413-2.526 |        |
|              | Wang <i>et al.</i>     | 1.461 | 0.771-2.768 |        |
|              | Gangwar <i>et al.</i>  | 0.939 | 0.466-1.892 |        |
|              | Zhi <i>et al.</i>      | 1.473 | 0.794-2.729 |        |
|              | Hirata <i>et al.</i> . | 1.067 | 0.480-2.367 |        |

---

B: mutated allele; A: wild allele



**Supplementary table 3.** *P* values of the Egger's test for the polymorphisms in *XRCC* genes.

| <b>Polymorphism</b>     | <b>Subgroup</b>         | <b>Egger'test <i>P</i> &gt;  t </b> |
|-------------------------|-------------------------|-------------------------------------|
| <i>XRCC1</i> -rs915927  | Overall                 | 0.397                               |
|                         | Caucasian               | 0.297                               |
|                         | H-B                     | 0.513                               |
|                         | BC                      | 0.611                               |
|                         | PCa                     | /                                   |
| <i>XRCC1</i> -rs25489   | Overall                 | 0.292                               |
|                         | Asian                   | 0.607                               |
|                         | Caucasian               | 0.518                               |
|                         | H-B                     | 0.211                               |
|                         | P-B                     | 0.647                               |
|                         | N                       | 0.121                               |
|                         | Y                       | 0.830                               |
|                         | BC                      | 0.297                               |
| <i>XRCC1</i> -rs3213245 | Overall                 | 0.075                               |
|                         | Asian                   | /                                   |
|                         | Y                       | 0.069                               |
|                         | BC                      | 0.069                               |
| <i>XRCC1</i> -rs25487   | Overall                 | 0.235                               |
|                         | Asian                   | 0.864                               |
|                         | Caucasian               | 0.988                               |
|                         | African                 | /                                   |
|                         | Mixed                   | 0.999                               |
|                         | H-B                     | 0.211                               |
|                         | P-B                     | 0.667                               |
|                         | N                       | 0.350                               |
| <i>XRCC1</i> -rs1799782 | Overall                 | 0.412                               |
|                         | H-B                     | 0.717                               |
|                         | P-B                     | 0.716                               |
|                         | N                       | /                                   |
|                         | Y                       | 0.948                               |
|                         | BC                      | 0.693                               |
|                         | PCa                     | 0.902                               |
|                         | <i>XRCC2</i> -rs3218536 | Overall                             |
| Caucasian               |                         | 0.331                               |
| H-B                     |                         | 0.315                               |
| Y                       |                         | 0.331                               |
| BC                      |                         | /                                   |
| <i>XRCC3</i> -rs1799796 | Overall                 | 0.681                               |
|                         | H-B                     | 0.248                               |
|                         | P-B                     | /                                   |
|                         | Y                       | 0.612                               |
|                         | BC                      | 0.612                               |

|                          |           |              |
|--------------------------|-----------|--------------|
| <i>XRCC3</i> -rs861539   | Overall   | 0.065        |
|                          | Asian     | 0.624        |
|                          | Caucasian | 0.059        |
|                          | Mixed     | 0.308        |
|                          | H-B       | 0.294        |
|                          | P-B       | 0.274        |
|                          | N         | 0.302        |
|                          | Y         | 0.967        |
|                          | BC        | 0.588        |
| <i>XRCC4</i> -rs28360071 | Overall   | <b>0.043</b> |
|                          | Asian     | 0.090        |
|                          | H-B       | 0.090        |
|                          | Y         | 0.090        |
|                          | BC        | /            |
| <i>XRCC4</i> -rs1805377  | Overall   | 0.094        |
|                          | Asian     | /            |
|                          | Caucasian | 0.370        |
|                          | H-B       | 0.082        |
|                          | Y         | 0.082        |
|                          | BC        | <b>0.009</b> |
| <i>XRCC4</i> -rs6869366  | Overall   | 0.107        |
|                          | Asian     | 0.174        |
|                          | H-B       | 0.174        |
|                          | Y         | 0.174        |
|                          | BC        | /            |
| <i>XRCC7</i> -rs7003908  | Overall   | 0.820        |
|                          | Asian     | 0.648        |
|                          | H-B       | 0.648        |
|                          | Y         | 0.648        |
|                          | BC        | 0.809        |
|                          | PCa       | /            |

---

PCa: prostate cancer; BC: bladder cancer; H-B: hospital-based; P-B: population-based; Y:

study conformed to HWE; N: study did not conform to HWE.

**Supplementary table 4.** The PRISMA 2009 checklist for current meta-analysis and systematic review.

| Section/topic             | # | Checklist item                                                                                                                                                                                                                                                                                              | Reported on page # |
|---------------------------|---|-------------------------------------------------------------------------------------------------------------------------------------------------------------------------------------------------------------------------------------------------------------------------------------------------------------|--------------------|
| <b>TITLE</b>              |   |                                                                                                                                                                                                                                                                                                             |                    |
| Title                     | 1 | Identify the report as a systematic review, meta-analysis, or both.                                                                                                                                                                                                                                         | 1                  |
| <b>ABSTRACT</b>           |   |                                                                                                                                                                                                                                                                                                             |                    |
| Structured summary        | 2 | Provide a structured summary including, as applicable: background; objectives; data sources; study eligibility criteria, participants, and interventions; study appraisal and synthesis methods; results; limitations; conclusions and implications of key findings; systematic review registration number. | 2                  |
| <b>INTRODUCTION</b>       |   |                                                                                                                                                                                                                                                                                                             |                    |
| Rationale                 | 3 | Describe the rationale for the review in the context of what is already known.                                                                                                                                                                                                                              | 2-3                |
| Objectives                | 4 | Provide an explicit statement of questions being addressed with reference to participants, interventions, comparisons, outcomes, and study design (PICOS).                                                                                                                                                  | 3                  |
| <b>METHODS</b>            |   |                                                                                                                                                                                                                                                                                                             |                    |
| Protocol and registration | 5 | Indicate if a review protocol exists, if and where it can be accessed (e.g., Web address), and, if available, provide registration information including registration number.                                                                                                                               | 4-5                |
| Eligibility criteria      | 6 | Specify study characteristics (e.g., PICOS, length of follow-up) and report characteristics (e.g., years considered, language, publication status) used as criteria for eligibility, giving rationale.                                                                                                      | 5                  |
| Information sources       | 7 | Describe all information sources (e.g., databases with dates of coverage, contact with study authors to identify additional studies) in the search and date last searched.                                                                                                                                  | 4-5                |
| Search                    | 8 | Present full electronic search strategy for at least one database, including any limits used, such that it could be repeated.                                                                                                                                                                               | 5                  |

|                                    |    |                                                                                                                                                                                                                        |       |
|------------------------------------|----|------------------------------------------------------------------------------------------------------------------------------------------------------------------------------------------------------------------------|-------|
| Study selection                    | 9  | State the process for selecting studies (i.e., screening, eligibility, included in systematic review, and, if applicable, included in the meta-analysis).                                                              | 5     |
| Data collection process            | 10 | Describe method of data extraction from reports (e.g., piloted forms, independently, in duplicate) and any processes for obtaining and confirming data from investigators.                                             | 6     |
| Data items                         | 11 | List and define all variables for which data were sought (e.g., PICOS, funding sources) and any assumptions and simplifications made.                                                                                  | 6     |
| Risk of bias in individual studies | 12 | Describe methods used for assessing risk of bias of individual studies (including specification of whether this was done at the study or outcome level), and how this information is to be used in any data synthesis. | 6-7   |
| Summary measures                   | 13 | State the principal summary measures (e.g., risk ratio, difference in means).                                                                                                                                          | 6     |
| Synthesis of results               | 14 | Describe the methods of handling data and combining results of studies, if done, including measures of consistency (e.g., $I^2$ ) for each meta-analysis.                                                              | 6-7   |
| Risk of bias across studies        | 15 | Specify any assessment of risk of bias that may affect the cumulative evidence (e.g., publication bias, selective reporting within studies).                                                                           | 7     |
| Additional analyses                | 16 | Describe methods of additional analyses (e.g., sensitivity or subgroup analyses, meta-regression), if done, indicating which were pre-specified.                                                                       | 6-7   |
| <b>RESULTS</b>                     |    |                                                                                                                                                                                                                        |       |
| Study selection                    | 17 | Give numbers of studies screened, assessed for eligibility, and included in the review, with reasons for exclusions at each stage, ideally with a flow diagram.                                                        | 7-8   |
| Study characteristics              | 18 | For each study, present characteristics for which data were extracted (e.g., study size, PICOS, follow-up period) and provide the citations.                                                                           | 8     |
| Risk of bias within studies        | 19 | Present data on risk of bias of each study and, if available, any outcome level assessment (see item 12).                                                                                                              | 10-11 |
| Results of individual studies      | 20 | For all outcomes considered (benefits or harms), present, for each study: (a) simple summary data for each                                                                                                             | 9-10  |

|                             |    |                                                                                                                                                                                      |       |
|-----------------------------|----|--------------------------------------------------------------------------------------------------------------------------------------------------------------------------------------|-------|
|                             |    | intervention group (b) effect estimates and confidence intervals, ideally with a forest plot.                                                                                        |       |
| Synthesis of results        | 21 | Present results of each meta-analysis done, including confidence intervals and measures of consistency.                                                                              | 9-10  |
| Risk of bias across studies | 22 | Present results of any assessment of risk of bias across studies (see Item 15).                                                                                                      | 10-11 |
| Additional analysis         | 23 | Give results of additional analyses, if done (e.g., sensitivity or subgroup analyses, meta-regression [see Item 16]).                                                                | 11-12 |
| <b>DISCUSSION</b>           |    |                                                                                                                                                                                      |       |
| Summary of evidence         | 24 | Summarize the main findings including the strength of evidence for each main outcome; consider their relevance to key groups (e.g., healthcare providers, users, and policy makers). | 13-14 |
| Limitations                 | 25 | Discuss limitations at study and outcome level (e.g., risk of bias), and at review-level (e.g., incomplete retrieval of identified research, reporting bias).                        | 15-16 |
| Conclusions                 | 26 | Provide a general interpretation of the results in the context of other evidence, and implications for future research.                                                              | 12-14 |
| <b>FUNDING</b>              |    |                                                                                                                                                                                      |       |
| Funding                     | 27 | Describe sources of funding for the systematic review and other support (e.g., supply of data); role of funders for the systematic review.                                           | 16    |

*From:* Moher D, Liberati A, Tetzlaff J, Altman DG, The PRISMA Group (2009). Preferred Reporting Items for Systematic Reviews and Meta-Analyses: The PRISMA Statement. PLoS Med 6(7): e1000097. doi:10.1371/journal.pmed1000097

For more information, visit: [www.prisma-statement.org](http://www.prisma-statement.org).
